# Supplementary material for: The cryostratigraphy of thermo-erosion gullies in the Canadian High Arctic demonstrates the resilience of permafrost
Source: Copernicus journal article supplement (doi:10.5194/egusphere-2024-208), 2024-03-14
Supplement: Supplementary file 1 [file egusphere-2024-208-supplement.pdf]

# Supplementary material for: The cryostratigraphy of thermo-erosion gullies in the Canadian High Arctic demonstrates the resilience of permafrost

Samuel Gagnon<sup>1,3</sup>, Daniel Fortier<sup>2,3</sup>, Étienne Godin<sup>3</sup>, Audrey Veillette<sup>2</sup>

- 5 <sup>1</sup>Département de Géographie, Université Laval, Québec, QC, G1V 0A6, Canada  
<sup>2</sup>Département de Géographie, Université de Montréal, Montréal, QC, H2V 2B8, Canada  
<sup>3</sup>Centre d'études nordiques, Université Laval, Québec, QC, G1V 0A6, Canada

*Correspondence to:* Samuel Gagnon (samuel.gagnon.1@gmail.com)

## Supplementary material 1. Calculation of thaw front depth (TFD) from temperatures recorded by thermistor cables.

- 10 TFD was interpolated linearly using ground temperature of the two depths encompassing 0°C on 29 July 2017 and 30 July 2018. Temperature values were recorded with thermistor cables at 0 cm, 10 cm, 20 cm, 30 cm, 40 cm, 80 cm, 120 cm, 160 cm, 200 cm, and 300 cm.

## Supplementary material 2. Calculation of volumetric ice content (VIC) and weighted average VIC and OMC.

Volumetric ice content (VIC;  $\text{cm}^3_{\text{ice}} \text{cm}^{-3}_{\text{soil}}$  (Phillips et al., 2015)) was calculated using:

15 
$$\text{VIC} = m_w (V_t \rho_{\text{ice}})^{-1}$$

- where  $m_w$  is the mass of water in the sample and  $\rho_{\text{ice}}$  is the density of ice,  $0.917 \text{ g cm}^{-3}$  (Andersland and Ladanyi, 2004). To obtain continuous VIC for the complete length of the boreholes, VIC values were assumed to be the same for the entirety of a given cryostructure where they were sampled. When multiple VIC values for the same cryostructure were available, the weighted average VIC ( $\text{VIC}_{\text{wa}}$ ) was calculated and used instead. OMC and soil composition values were calculated in a similar manner to VIC: they were assumed to be the same for the entirety of the corresponding stratigraphic layer and when multiple values for the same layer were available, the weighted average OMC ( $\text{OMC}_{\text{wa}}$ )/soil composition were used.
- 20

## Supplementary material 3. Grain size analyses.

- Grain size analyses were performed on the dry samples using a sieve column (0.5 phi increments, 1.0 mm, 1.4 mm, 2.0 mm, 2.8 mm, 4.0 mm, 5.6 mm, 8.0 mm, 11.2 mm, 16.0 mm) for particles  $>1.0 \text{ mm}$  and a particle size analyzer (triplicate measurements; Horiba Partica LA-950V2) for particles  $\leq 1.0 \text{ mm}$ . Soil composition was determined by calculating the
- 25

proportion (% of total mass) of gravel (>2 mm), sand (>63  $\mu\text{m}$  to  $\leq 2$  mm), and silt ( $\leq 63$   $\mu\text{m}$ ) in each sample. Clay ( $\leq 2$   $\mu\text{m}$ ) was not described as it accounted for <1% in virtually all samples.

30 **Supplementary table 1. Thaw front depth measured on 29 July 2017 and 30 July 2018 with probing at different locations in the two thermo-erosion gullies (TEG1 and TEG2) and by linear interpolation from ground temperature measurements at two reference stations in undisturbed conditions (BYLOTPD and IP-A).**

| Site      | Position                | Thaw front depth<br>29 July 2017 | Thaw front depth<br>30 July 2018 |
|-----------|-------------------------|----------------------------------|----------------------------------|
| TEG1_TFD1 | Shoulders               | 22                               | 25                               |
|           | Slopes                  | 42                               | 39                               |
|           | Bottom of gully channel | 42                               | 28                               |
| TEG1_TFD2 | Shoulders               | 41                               | 52                               |
|           | Slopes                  | 53                               | 52                               |
|           | Bottom of gully channel | 41                               | 39                               |
| TEG1_TFD3 | Shoulders               | 27                               |                                  |
|           | Slopes                  | 44                               |                                  |
|           | Bottom of gully channel | 40                               |                                  |
| TEG1_TFD4 | Shoulders               | 14                               |                                  |
|           | Slopes                  | 46                               |                                  |
|           | Bottom of gully channel | 33                               |                                  |
| TEG2_TFD1 | Shoulders               |                                  | 44                               |
|           | Slopes                  |                                  | 27                               |
|           | Bottom of gully channel |                                  | 53                               |
| TEG2_TFD2 | Shoulders               |                                  | 34                               |
|           | Slopes                  |                                  | 30                               |
|           | Bottom of gully channel |                                  | 53                               |
| TEG2_TFD3 | Shoulders               |                                  | 44                               |
|           | Slopes                  |                                  | 35                               |
|           | Bottom of gully channel |                                  | 62                               |
| BYLOTPD   | Undisturbed polygon     | 22                               | 26                               |
| IP-A      | Undisturbed polygon     | 34                               | 34                               |

35 **Supplementary table 2. Proportion of the types of sediments composing the cryostructures in all boreholes from thermo-erosion gullies R05 and R08. The proportion was calculated by dividing the total length of a type of sediment within a cryostructure by the total length covered by the cryostructure.**

| Types of sediment in each cryostructure | Proportion (%) |
|-----------------------------------------|----------------|
| <b>Crustal</b>                          |                |
| Silty sandy gravel                      | 81.0           |
| Gravelly silty sand                     | 19.0           |
| <b>Ice veins</b>                        |                |
| Sandy silt                              | 100.0          |
| <b>Interstitial</b>                     |                |
| Silty sand                              | 67.6           |
| Sandy silt                              | 29.7           |
| Sandy silt, peaty                       | 2.7            |
| <b>Interstitial visible</b>             |                |
| Silty sand                              | 79.3           |
| Sandy silt                              | 15.5           |
| Gravelly silty sand                     | 5.2            |
| <b>Layered</b>                          |                |
| Sandy silt                              | 63.0           |
| Silty sand                              | 37.0           |
| <b>Lenticular</b>                       |                |
| Sandy silt                              | 100.0          |
| <b>Lenticular (ice lens)</b>            |                |
| Sandy silt                              | 73.8           |
| Sandy silt, peaty                       | 12.3           |
| Silty sand                              | 10.8           |
| Silty sandy gravel                      | 3.1            |
| <b>Organic matrix</b>                   |                |
| Sandy silt, peaty                       | 60.3           |
| Silty sand, peaty                       | 39.7           |
| <b>Poorly defined (transitional)</b>    |                |
| Sandy silt                              | 60.9           |
| Silty sand, peaty                       | 21.8           |
| Silty sand                              | 12.6           |
| Sandy silt, peaty                       | 4.6            |
| <b>Reticulate</b>                       |                |
| Sandy silt                              | 85.5           |
| Gravelly sandy silt                     | 7.8            |
| Silty sand                              | 4.9            |
| Silty sand, peaty                       | 1.8            |
| <b>Suspended</b>                        |                |

|                     |      |
|---------------------|------|
| Sandy silt          | 68.4 |
| Silt                | 15.1 |
| Silty sand          | 13.8 |
| Gravelly silty sand | 1.8  |
| Silty sand, peaty   | 0.9  |

**Supplementary table 3. Proportion of cryostructures in all cores, in each core, each thermo-erosion gully (TEG1 and TEG2), and for the geocryological layers.**

| Site                      | Proportion of cryostructure (%) |     |     |      |      |      |      |      |      |      |      |
|---------------------------|---------------------------------|-----|-----|------|------|------|------|------|------|------|------|
|                           | IV                              | III | Len | Cru  | In   | PD   | Iv   | Sus  | Lay  | Org  | Re   |
| All                       | 0.9                             | 1.9 | 2.1 | 2.5  | 4.3  | 5.1  | 7.9  | 13.2 | 17.4 | 18.5 | 26.2 |
| TEG1                      | 0.8                             | 2.3 | 1.1 | 4.9  | 6.9  | 4.6  | 14   | 6.6  | 15.4 | 20.9 | 22.6 |
| TEG1-1 <sub>Undist</sub>  | 0                               | 1.5 | 0   | 52.3 | 16.9 | 0    | 21.5 | 0    | 0    | 0    | 7.7  |
| TEG1-2 <sub>Undist</sub>  | 0                               | 2.7 | 0   | 0    | 0    | 0    | 20.9 | 0    | 36.4 | 13.6 | 26.4 |
| TEG1-3 <sub>Undist</sub>  | 0                               | 0   | 0   | 0    | 0    | 0    | 0    | 0    | 47.9 | 52.1 | 0    |
| TEG1-1 <sub>Drained</sub> | 0                               | 0   | 0   | 0    | 50.7 | 0    | 0    | 15.1 | 0    | 34.2 | 0    |
| TEG1-2 <sub>Drained</sub> | 0                               | 1.9 | 0   | 0    | 0    | 3.8  | 22.6 | 32.1 | 0    | 14.2 | 25.5 |
| TEG1-3 <sub>Drained</sub> | 0                               | 0.5 | 0   | 0    | 12.1 | 0    | 8.2  | 0    | 38.5 | 28.6 | 12.1 |
| TEG1-1 <sub>Slope</sub>   | 0                               | 2.7 | 0   | 7.1  | 0    | 18.8 | 21.4 | 0    | 0    | 18.8 | 31.3 |
| TEG1-2 <sub>Slope</sub>   | 6.5                             | 9.3 | 8.4 | 0    | 0    | 13.1 | 20.6 | 1.9  | 10.3 | 16.8 | 13.1 |
| TEG1-3 <sub>Slope</sub>   | 0                               | 0   | 0   | 0    | 0    | 0    | 5.3  | 9.5  | 0    | 9.5  | 75.8 |
| TEG2                      | 0.9                             | 1.5 | 3.2 | 0    | 1.8  | 5.6  | 1.9  | 19.7 | 19.4 | 16.2 | 29.8 |
| TEG2-1 <sub>Undist</sub>  | 0                               | 0   | 9.8 | 0    | 0    | 2.7  | 0    | 26.8 | 2.7  | 15.2 | 42.9 |
| TEG2-2 <sub>Undist</sub>  | 0                               | 0   | 0   | 0    | 0    | 0    | 0    | 19.2 | 34.6 | 37.5 | 8.7  |
| TEG2-1 <sub>Drained</sub> | 8.3                             | 8.3 | 5.2 | 0    | 0    | 0    | 0    | 5.2  | 7.3  | 38.5 | 27.1 |
| TEG2-2 <sub>Drained</sub> | 0                               | 0   | 0   | 0    | 2    | 7    | 0    | 0    | 45   | 25   | 21   |
| TEG2-1 <sub>Slope</sub>   | 0                               | 3   | 5   | 0    | 0    | 16   | 0    | 17   | 4    | 21   | 34   |
| TEG2-2 <sub>Slope</sub>   | 0                               | 0   | 6.7 | 0    | 6.7  | 0    | 0    | 34.4 | 26.7 | 0    | 25.6 |
| TEG2-3 <sub>Slope</sub>   | 0                               | 2   | 0   | 0    | 0    | 6.9  | 8.9  | 0    | 29.7 | 0    | 52.5 |
| TEG2 <sub>BGC</sub>       | 0                               | 0   | 0   | 0    | 4.6  | 9.8  | 4.6  | 43.1 | 11.1 | 0    | 26.8 |
| Frozen AL                 | 0                               | 2.5 | 6.5 | 4.7  | 8.6  | 14.4 | 16.5 | 0    | 0    | 42.8 | 4    |
| Transient L               | 3.1                             | 1.1 | 3.1 | 9.3  | 6.2  | 5.8  | 16.2 | 0    | 2.2  | 23   | 30.1 |
| Intermediate L            | 0                               | 1.8 | 1.9 | 0    | 0    | 2.8  | 1.2  | 30.2 | 27.9 | 2.3  | 31.9 |
| Buried IL                 | 0                               | 4.6 | 0   | 0    | 0    | 0    | 2.5  | 16.6 | 38.5 | 4.9  | 32.9 |
| Permafrost                | 2.3                             | 0   | 0   | 2.3  | 10.2 | 5.1  | 11.1 | 1.7  | 6.8  | 33.8 | 26.7 |

Cryostructures: IV = Ice vein, III = Isolated ice lens, Len = Lenticular, Cru = Crustal, In = Interstitial, PD = Poorly defined,

40 Iv = Interstitial visible, Sus = Suspended, Lay = Layered, Org = Organic matrix, Re = Reticulate

Geocryological layers: Frozen AL = Frozen part of the active layer, Transient L = Transient layer, Intermediate L = Intermediate layer, Buried IL = Buried intermediate layer

## References

45 Andersland, O. B. and Ladanyi, B.: Frozen Ground Engineering, 2nd edition., Wiley, 384 pp., 2004.

Phillips, M. R., Burn, C. R., Wolfe, S. A., Morse, P. D., Gaanderse, A. J., O 'Neill, H. B., Shugar, D. H., and Gruber, S.: Improving water content description of ice-rich permafrost soils, <https://doi.org/10.13140/RG.2.1.4760.1126>, 2015.
