# Supplementary material for: The cryostratigraphy of thermo-erosion gullies in the Canadian High Arctic demonstrates the resilience of permafrost
Source: Copernicus journal article supplement (doi:10.5194/egusphere-2024-208), 2024-03-14
Supplement: Supplementary file [file egusphere-2024-208-RC1-supplement.pdf]

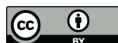

# The cryostratigraphy of thermo-erosion gullies in the Canadian High Arctic demonstrates the resilience of permafrost

Samuel Gagnon<sup>1,3</sup>, Daniel Fortier<sup>2,3</sup>, Étienne Godin<sup>3</sup>, Audrey Veillette<sup>2</sup>

<sup>1</sup>Département de Géographie, Université Laval, Québec, QC, G1V 0A6, Canada

5 <sup>2</sup>Département de Géographie, Université de Montréal, Montréal, QC, H2V 2B8, Canada

<sup>3</sup>Centre d'études nordiques, Université Laval, Québec, QC, G1V 0A6, Canada

*Correspondence to:* Samuel Gagnon (samuel.gagnon.1@gmail.com)

**Abstract.** Thermo-erosion gullies (TEGs) are one of the most common forms of abrupt permafrost degradation. They generally form in ice-wedge polygonal networks where the interconnected troughs can channel runoff water. Although TEG can form within a single thawing season, it takes them several decades for their complete stabilization. While the inception of TEGs has been examined in several studies, the processes of their stabilization remain poorly documented, especially the **ground ice patterns** that form following permafrost aggradation in stabilizing TEGs. For this study, we investigated the impacts of two TEGs in the Canadian High Arctic (Bylot Island, NU, Canada) on ground ice content, cryostratigraphic patterns, and geomorphology to examine permafrost recovery following thermal erosion in ice-wedge polygonal tundra. We sampled 17 permafrost cores from two TEGs – one still active (since 1999) and one stabilized (>100 years old) – to describe the surface conditions, interpret the cryostratigraphic patterns, and characterize the state of permafrost after TEG stabilization. We observed that although the TEG caused discernable cryostratigraphic patterns, ground ice content and active layer thickness of the TEGs were comparable to measurements made in undisturbed conditions. We also noted that once stabilized, TEGs permanently (at the Anthropocene scale) alter landscape morphology and hydrological connectivity. We concluded that although the formation of a TEG has profound effects on the **short/medium term** and leaves near permanent geomorphological and hydrological scars in periglacial landscapes, on the **long term**, High Arctic permafrost can recover and return to geocryological conditions similar to those pre-dating the initial disturbance. This suggests that in stable environmental conditions undergoing natural variability, permafrost can persist longer than the geomorphological landforms in which it forms.

## 25 1. Introduction

Thermal erosion and the formation of thermo-erosion gullies (TEGs) are one of the most common forms of abrupt permafrost degradation (Abbott et al., 2015; Kokelj and Jorgenson, 2013; Olefeldt et al., 2016; Turetsky et al., 2020). Thermal erosion, which is defined as the erosion of ice-rich permafrost by the combined thermal and mechanical action of moving water (Goudie, 2004), often occurs in **ice-wedge polygonal networks** due to the interconnected troughs that can channel runoff water (i.e., snowmelt, summer precipitations, melting of ground ice) along ice wedges (Fortier et al., 2007;

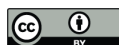

French, 2007; Godin and Fortier, 2012b). TEGs in polygonal networks are initiated by the infiltration of runoff water (e.g., snowmelt, rainfall) into open cracks and cavities in the active layer and can develop over a single thawing season (e.g., Fortier et al. 2007). Over time, TEG can merge and form extensive gully systems which can eventually turn into thermo-erosion valleys (Fortier et al., 2007; French, 2017; Gagnon and Allard, 2019; Morgenstern et al., 2021; Arè et al., 1979; 35 Godin and Fortier, 2012b). Although the formation of TEGs can significantly affect permafrost environments by altering **landscape morphology and ecosystem functions** (Bowden et al., 2008; Liljedahl et al., 2007; Toniolo et al., 2009; Lacelle et al., 2010; Lantz and Kokelj, 2008; Levy et al., 2008; Morgenstern et al., 2021; Grosse et al., 2006, 2005), TEG are an integral part of landscape evolution in areas of continuous permafrost (Godin et al., 2014).

However, the processes of stabilization of TEGs remain poorly documented, especially the **ground ice patterns** that 40 form following permafrost aggradation in stabilizing TEG. Ground ice and its patterns of distribution, i.e., the **cryostratigraphy and cryostructures**, can provide valuable information on the conditions of permafrost formation and its potential response to warming and thawing (Gilbert et al., 2016). Because they can provide insights about the ground freezing processes (Murton, 2013), cryostructures have been investigated in different environments such as coastlands (Murton and French, 1994; Burn, 1997), yedoma and drained thermokarst lake basin (Kanevskiy et al., 2011; Jongejans et 45 al., 2018), lacustrine lowlands (Kanevskiy et al., 2014), and to study buried glacier ice (Coulombe et al., 2019). Such characterization has yet to be done in TEGs. This would help understand and predict the response of permafrost to thermal erosion, i.e., its resilience, which we define permafrost resilience as the capacity of permafrost to recover to a pre-disturbance state (ground temperature below 0°C, similar ground ice contents and morphologies) following a disturbance and the associated perturbations (Chapin et al., 2009; Jorgenson et al., 2010; Piégay et al., 2020; Thoms et al., 2018).

For this study, we investigated the geocryological and geomorphological processes of permafrost recovery 50 following thermal erosion in ice-wedge polygonal tundra. More specifically, this study aimed: 1) to characterize the cryostructures and cryostratigraphic patterns of two TEGs in polygonal tundra, 2) to determine the impacts of thermal erosion on the ground ice content and surface characteristics of the two TEGs and compare them with undisturbed surrounding polygons, 3) to describe the stages of TEG stabilization based on changes in surface geomorphology and 55 permafrost cryostratigraphy, and 4) to evaluate the stability and resilience of permafrost after thermal erosion based on ground ice content and cryostratigraphic patterns. To our knowledge, this study is the first to report ground ice contents and cryostratigraphic data in TEGs, which were used to discuss the evolution of periglacial landscapes following thermal erosion in areas with cold ice-rich permafrost.

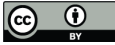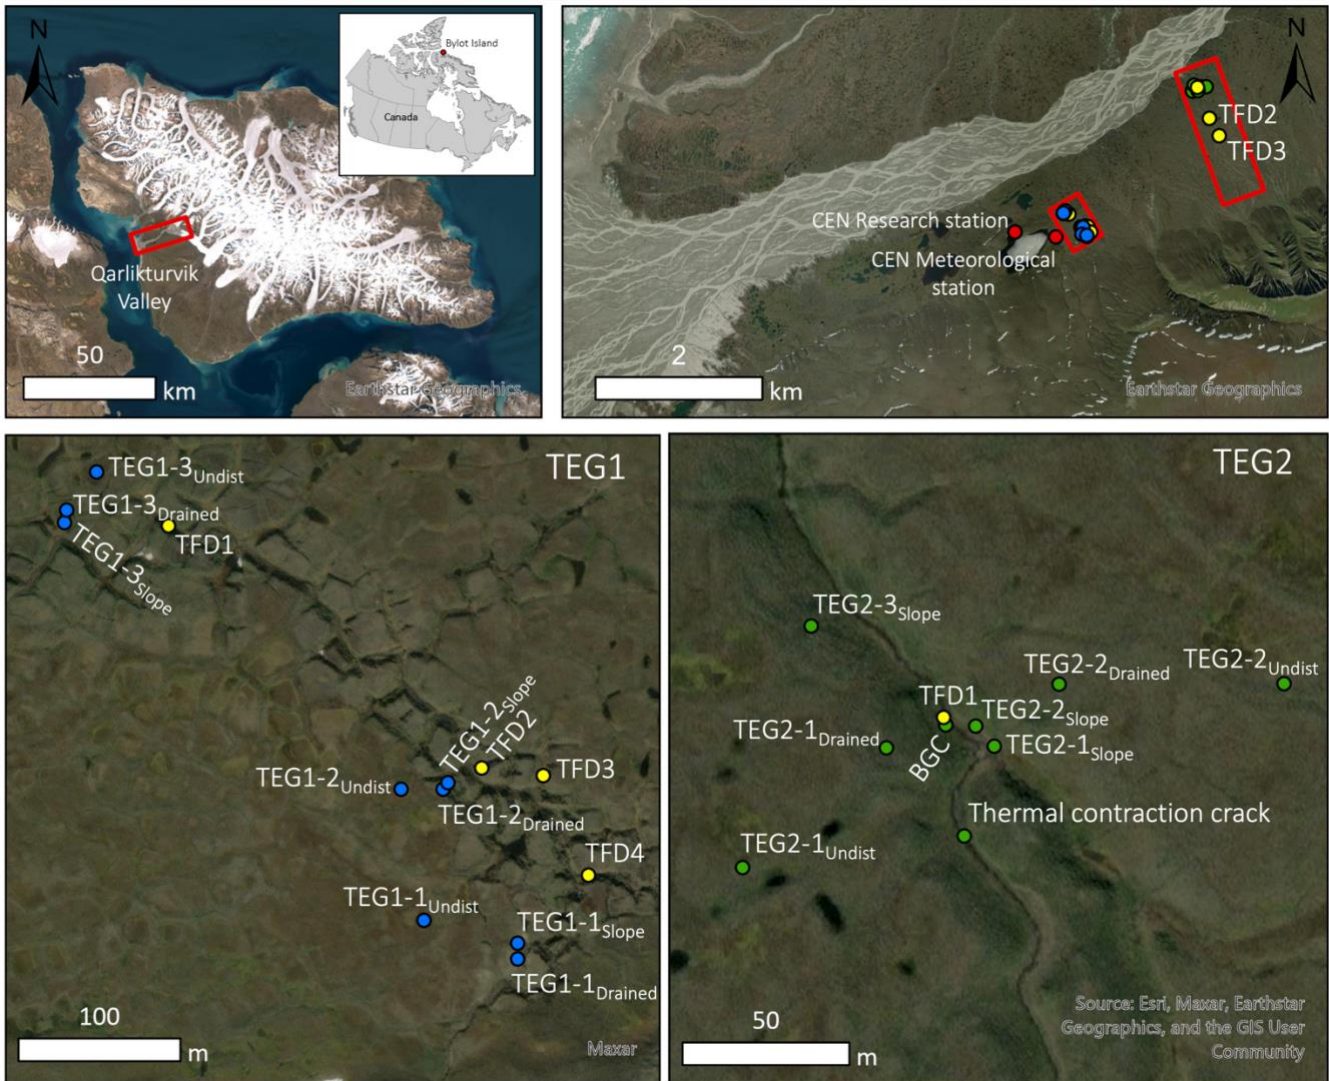

60 **Figure 1:** Location of the thermo-erosion gullies (TEG) in the Qarlikturvik valley, Bylot Island (NU, Canada). The cores (blue  
 (TEG1) and green (TEG2) dots) and **thaw front depth (TFD)** transects (yellow dots, center of the transect) for each TEG are  
 indicated in the bottom images. Cores were retrieved in undisturbed polygons, drained polygons, in the slopes of the gullies, and at  
 the bottom of the gully channel (BGC) of TEG2. TEG2-TFD2 and TEG2-TFD3 are shown in the top right image, upstream of the  
 65 boreholes. The Center for Northern Studies (CEN) research and meteorological stations are indicated with red dots. Sources: Esri  
 ArcGIS Pro World Imagery basemap, Earthstar Geographics (15 m resolution; top images), and Maxar (30 cm resolution; bottom  
 images), and the GIS User Community.

## 2. Study site

The two TEGs studied for this research are located in the Qarlikturvik Valley on the southwestern plain of Bylot Island, Nunavut (Canada) (Figure 1). We selected Bylot Island for its cold ice-rich permafrost, the abundance of TEG developed in  
 70 ice-wedge polygons in the Qarlikturvik Valley, and for the availability of meteorological and **thermal data** in the area. The

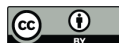

~17 km-long glacial valley is oriented east-northeast west-southwest with a floor about 4-5 km wide. Two glaciers (C-79 and C-93) at the valley head feed a proglacial river that runs through braided channels in an outwash plain (Inland Waters Branch, 1969). The plain is bordered on both sides by terraces composed of over 4 to 5 m of organic-rich silty aeolian deposits and, in some areas, alluvial gravelly silty sands, overlying glaciofluvial deposits (Allard, 1996; Fortier et al., 2006).  
75 Well-developed networks of low-centered ice-wedge polygons that have formed syngenetically during the Late Holocene as well as thaw ponds, tundra lakes and pingos cover the terraces (Fortier and Allard, 2004).

The region has a high-Arctic climate and is underlain by continuous permafrost estimated to be more than 400 m in thickness in some areas (Maxwell, 1980; Smith and Burgess, 2002). Based on meteorological data recorded near (73°9'21.6"N, 79°57'24.8"W, 12 m a.s.l.) the Center for Northern Studies (CEN) research station on Bylot Island (Figure 1),  
80 mean annual air temperature was -14.6°C for the 1995-2018 period (missing 1997, 1998, 2009, 2010, and 2014) (Climate station data from Bylot Island in Nunavut, Canada, v. 1.11 (1992-2019). Nordicana D2, doi: 10.5885/45039SL-EE76C1BDAADC4890). Mean annual precipitations recorded at the Mattimatalik (Pond Inlet) Airport (72°41'N, 77°58'W, 61.6 m a.s.l.), which is about 85 km southwest of the study area, was 189 mm for the 1981-2010 period, 48% of which fell as rain between June and November (Historical Climate Data - Climatic data of Pond Inlet, Nunavut, 2022). Surface vegetation  
85 in the valley floor is mainly composed of sedges, grasses, and mosses typical of wetlands and environments with a high water table (Perreault et al., 2016).

~~The first TEG,~~ TEG1, has been studied since its initiation in 1999 (R08 in Fortier et al., 2007; Godin and Fortier, 2012b; Rioux, 2020). TEG1 is located on the southern terrace of the Qarlikturvik Valley, about 800 m east of the CEN research station and 5.5 km from the valley mouth (Figure 1). It cuts into the north-facing terrace, which is gently sloping  
90 (2%) toward the outwash river and about 20 m a.s.l. (Godin and Fortier, 2012b). The gully showed high rates of erosion during the first years following its inception that decreased over the years (from 390 m a<sup>-1</sup> in 1999 to 5 m a<sup>-1</sup> for the 2013-2017 period) (Fortier et al., 2007; Godin and Fortier, 2012b, a; Rioux, 2020). TEG1 had a main axis length of 863±4 m and formed a hydrological network of 33 458±379 m<sup>2</sup> in 2017 (Rioux, 2020), and was still active in 2021 during fieldwork in the area. ~~The second TEG,~~ TEG2 (R05 in Godin and Fortier, 2012a; Veillette, 2019), is also located on the southern terrace of  
95 the valley, about 2.8 km east of the CEN research station and 7.4 km from the valley mouth (Figure 1). TEG2 had a main axis length of 1899 m and a surface area of 29 485 m<sup>2</sup> in 2010 (Godin and Fortier, 2012a). The head TEG2 is located at the junction between two alluvial fans that formed from sediments eroded in the deep ravines incising the plateau of sedimentary rocks (Veillette, 2019). TEG2 cuts through the polygonal terrace (1.2% slope) before reaching the proglacial river. Aerial photos (1958, 1961, 1972, 1982) and satellite imagery (2007, 2010) showed that TEG2 was already stabilized in 1958 and  
100 therefore much older than 65 years old (1958-2023) (Godin and Fortier, 2012a; Veillette, 2019). Based on stabilization rates by Godin and Fortier (2012a), the gully is likely >100 years old.



### 3. Methods

#### 3.1 Fieldwork and laboratory analyses

Fieldwork was carried out between June and August in 2013, 2016, 2017 and 2018. To assess the impacts of the TEG on the  
105 permafrost thermal regime, thaw front depth (TFD) was measured at different locations at TEG1 and TEG2 (Figure 1). TFD  
was obtained by probing to refusal with a graduated steel rod in 2017 from 13 June to 29 July, and in 2018 from 12 June to  
16 August. Measurements were made every 2-3 days along transects of ~30 points (10 to 30 m in length) perpendicular to  
the TEG and averaged into three sections (shoulders, slopes, and channel; Figure 2). TFD was also calculated from  
temperatures (Supplementary material 1) recorded by thermistor cables installed in two boreholes in undisturbed low-  
110 centered polygons, one adjacent to TEG1 (IP-A, see Godin et al. 2016) and the other one about two kilometres west of TEG1  
(BYLOTPD; Allard et al., 2020). The tundra polygons near the gullies were described based on their shape (low-centered,  
flat, high-centered) and the drainage conditions (standing water, mesic, drained). To measure ground ice content and analyse  
soil composition, the TEG and the surrounding polygons were drilled using a portable earth-drill, with a 10 cm-diameter core  
barrel. At TEG1, we drilled in 2013 along and in the TEG at three subsites of different ages (Figure 2). At each subsite, one  
115 hole was drilled in an undisturbed polygon (TEG1-1<sub>Undist</sub>, TEG1-2<sub>Undist</sub>, TEG1-3<sub>Undist</sub>), one in a drained polygon adjacent to  
the TEG (TEG1-1<sub>Drained</sub>, TEG1-2<sub>Drained</sub>, TEG1-3<sub>Drained</sub>), and one in the gully slope adjacent to the drained polygon (TEG1-  
1<sub>Slope</sub>, TEG1-2<sub>Slope</sub>, TEG1-3<sub>Slope</sub>). At TEG2, we drilled at eight locations in 2016 to extract permafrost cores down to 1.15 to  
2.12 m. The holes were located on a ~170 m transect going across TEG2 and sampled undisturbed polygons (TEG2-1<sub>Undist</sub>,  
TEG2-2<sub>Undist</sub>), drained polygons adjacent to the TEG (TEG2-1<sub>Drained</sub>, TEG2-2<sub>Drained</sub>), gully slopes (TEG2-1<sub>Slope</sub>, TEG2-2<sub>Slope</sub>,  
120 TEG2-3<sub>Slope</sub>), and the bottom of the gully channel (TEG2<sub>BGC</sub>) (Figure 1; Figure 2). All permafrost cores were kept frozen and  
brought back to Université de Montréal for laboratory analyses.

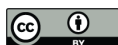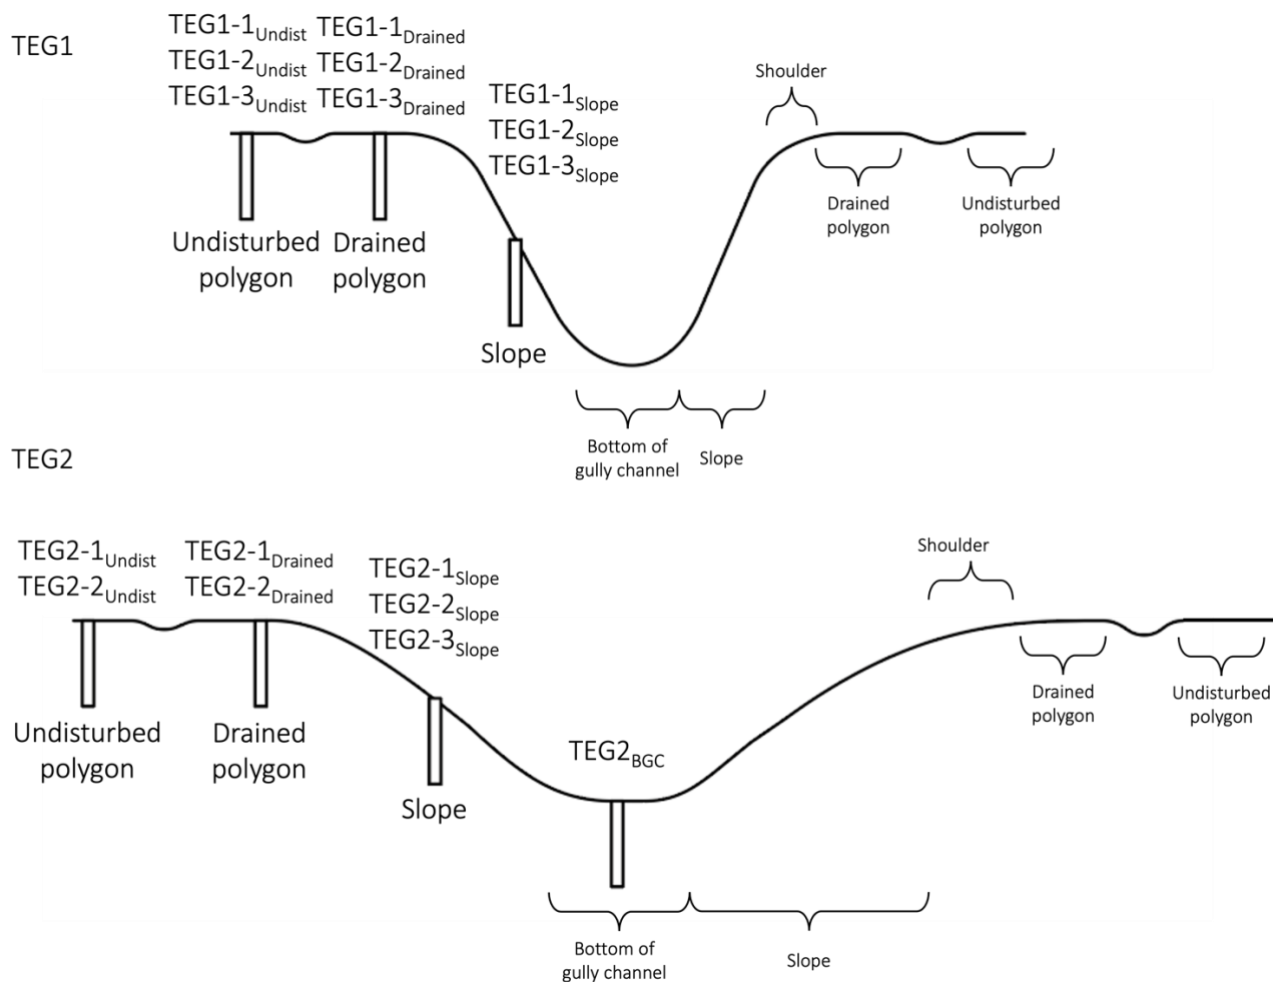

125 **Figure 2.** Conceptual cross-section of the two thermo-erosion gullies (TEG1 and TEG2), sections of the TEGs where thaw front depth was probed (only one side is annotated, but for slopes and shoulders, both sides were probed), and locations where we drilled into permafrost. The locations of the cores are relative to the cross-section of the gullies, for their exact location see Figure 1. Figure not to scale.

The cores were first scanned using micro-computed tomodensitometric analysis (CT-scan SOMATOM Definition AS+128, Siemens®, resolution of 0.4 mm). The scans were used to characterize the cryostructures present in permafrost (Calmels and Allard, 2004). Cryostructures were described using a classification based on existing literature (French and Shur, 2010; Kanevskiy et al., 2013; Murton, 2013). Then, the cores were cut into samples corresponding to the main cryostructures and sediment textures, and vacuum sealed in plastic bags to determine their total volume ( $V_t$ ) using the water displacement method (Strauss et al., 2013). After, the samples were weighted, dried in an oven at 105°C until dry, and reweighted to determine the water content. The volume and mass of the samples were used to calculate bulk ( $\rho_{\text{bulk}}$ ) and dry ( $\rho_{\text{dry}}$ ) densities, and the mass of water for volumetric ice content (VIC;  $\text{cm}^3_{\text{ice}} \text{cm}^{-3}_{\text{soil}}$  Supplementary material 2). Soil composition was determined by calculating the proportion (% of total mass) of gravel (>2 mm), sand (>63  $\mu\text{m}$  to  $\leq 2$  mm),

130  
135



and silt ( $\leq 63 \mu\text{m}$ ) in each sample (Supplementary material 3). Clay ( $\leq 2 \mu\text{m}$ ) was not described as it accounted for  $<1\%$  in all samples. Organic matter content (OMC) was determined using the loss-on-ignition method (5-10g triplicates at  $550^\circ\text{C}$  for 5h, Gagnon and Allard, 2020).

### 3.2 Data analyses

140 The weighted average VIC ( $\text{VIC}_{\text{wa}}$ ) and OMC ( $\text{OMC}_{\text{wa}}$ ) were calculated for each cryostructure, cores from a same hole (hereafter referred as cores), and TEG (Supplementary material 2). To facilitate comparison between cores,  $\text{VIC}_{\text{wa}}$  and  $\text{OMC}_{\text{wa}}$  down to one meter were used ( $\text{VIC}_{\text{wa}}$  and  $\text{OMC}_{\text{wa}}$  hereafter describe the weighted average down to 1 m). For TEG1-1<sub>Undist</sub> and TEG1-1<sub>Drained</sub>, which were 95 cm and 96 cm deep, respectively, the bottom cryostructure/stratigraphy and associated VIC/OMC were assumed to be the same down to 100 cm deep.

145 To produce the generalized stratigraphy of each core, we used the grain size statistics combined with the photographs and CT-scans of the cores. Grain size analyses were performed with the GRADISTAT program (version 9.1) (Blott and Pye, 2001). Based on sediment size classes derived from sieving and the particle size analyzer, the program generated statistical parameters that were used to determine the textural groups and the types of sediment (Folk and Ward (1957) measures were used). We also performed statistical analyses to determine if VIC differed between the two TEG,  
150 between all sub-sites of the TEG, and between the position of the cores about the TEGs (i.e., undisturbed polygon, drained polygon, gully slope, gully channel) using RStudio software (RStudio Inc., version 1.4.1103). This was done using  $\text{VIC}_{\text{wa}}$  down to 1 m of each core in a one-way analysis of variance (ANOVA) with a 95% confidence interval followed by a Tukey's HSD analysis.

## 4. Results

### 155 4.1 State of the TEG, polygon shape, and active layer thickness

The two TEG differed significantly in their surface characteristics and general shape. TEG1 was characterized by a narrow ( $\sim 10$  m) box-shaped main channel, i.e., high-angle slopes connecting to a flat gully channel bottom, and had many ramifications through the surrounding polygonal network. Erosion was apparent in all the channels, i.e., the sides of channels were steep and uneven with blocks of ground falling off, causing the soil to be exposed (Figure 3). It was also possible to see  
160 thermokarst mounds, i.e., baydzherakhi, in the main channel of TEG1 where erosion isolated polygons. TEG2 was characterized by a well-developed main channel with few ramifications. The main channel was wide (20-30 m from side to side) with a flat bottom and the slopes were smooth and at low angle (Figure 3). Both the sides and bottom of the gully channel and the sides were stabilized with a continuous vegetation cover except at the bottom of the gully channel where water was flowing.

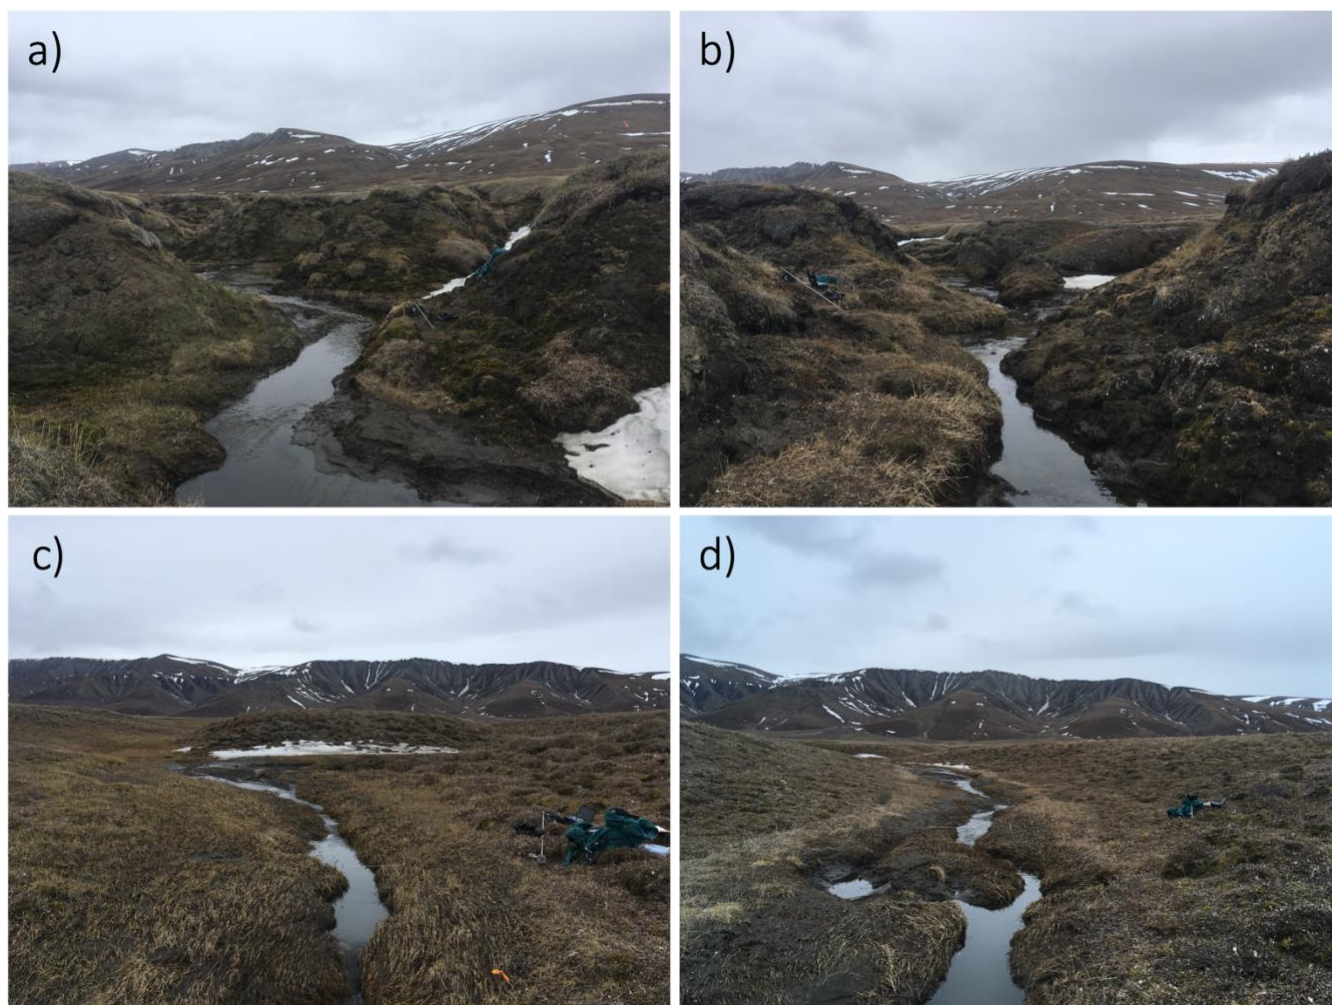

165

**Figure 3. Thermo-erosion gullies 1 (TEG1, a-b) and 2 (TEG2, c-d). a) TEG1, near subsite TEG1-2, b) TEG1, near subsite TEG1-3. c) TEG2, near the transect where the cores were drilled, and d) TEG2, near TEG2\_TFD2, about 400 m upstream of the boreholes. All pictures were taken on 24 June 2018 and point South-East. The backpack on the pictures is about 80 cm long.**

For both TEG1 and TEG2, the polygons adjacent to the TEG were drained, i.e., mesic to dry (TEG1-1-2-3<sub>Drained</sub>,  
170 TEG2-1-2<sub>Drained</sub>), compared to ~~other~~ undisturbed polygons away from the gully incisions where standing water was common  
(TEG1-1-2-3<sub>Undist</sub>, TEG2-1-2<sub>Undist</sub>). At TEG1, the drained polygons adjacent to the TEG were low-centered. At TEG2, the  
drained polygons were flat or high-centered while the undisturbed polygons were low-centered. In addition, the area  
encompassing the drained polygons along the TEG was also higher in elevation than the surrounding low-centered polygons  
(based on a normalized topographic position index, see Veillette, 2019). Over 70 thermal contraction cracks were found at  
175 the bottom of the gully channel and on the slopes of TEG2 (Veillette, 2019). The cracks seemed to follow the same pre-  
disturbance polygonal network as many cracks were extending from the troughs of the surrounding network.



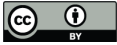

**TFD** varied between the two TEG and depending on the location of the measurements in the TEG. At TEG1, TEG1\_TFD1-2-3 averaged 26 cm, 46 cm, and 39 cm on 29 July 2017 for the shoulders, slopes, and bottom of the gully channel, respectively (Supplementary table 1). On 30 July 2018, TEG1\_TFD1 and TEG1\_TFD3 averaged 38 cm (shoulders), 46 cm (slopes), and 34 cm (bottom of gully channel). Although there was some variability (e.g., TEG1\_TFD2 2018), the general trend in TFD at TEG1 was deepest on the slopes and shallowest on the shoulders, and measurements on the slopes and the gully channel were comparable to undisturbed **TFD** (BYLOTPD and IP-A) (Figure 4a-b-c-d-e-f). At TEG2, TEG2\_TFD1-2-3 averaged 41 cm, 30 cm, and 56 cm on 30 July 2018 for the shoulders, slopes, and bottom of the gully channel, respectively (Supplementary table 1). All three locations at TEG2 showed the same trend: **TFD** was deepest at the bottom of the gully channel and shallowest on the slopes, which were similar to undisturbed **TFD** (Figure 4g-h-i). Shoulder values showed more variability than at TEG1.

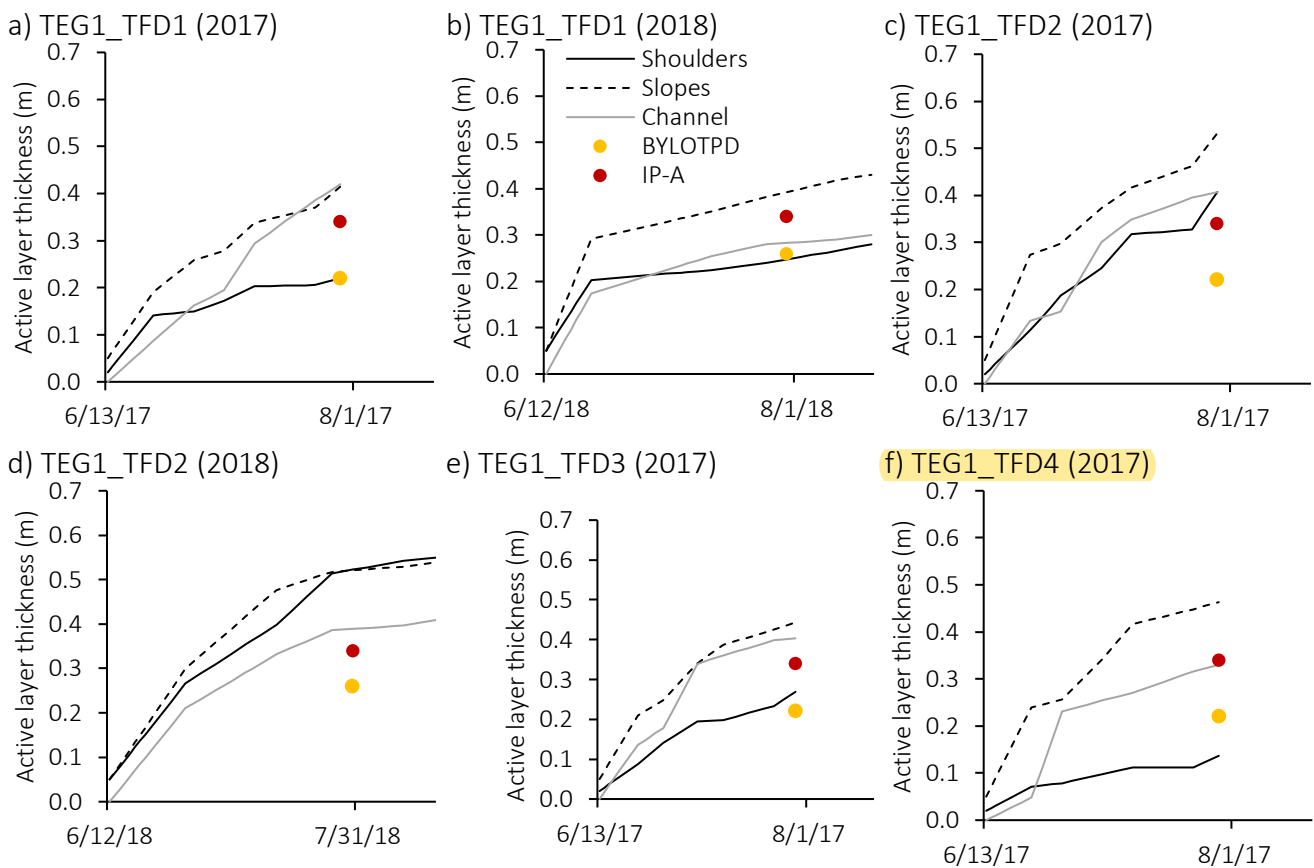

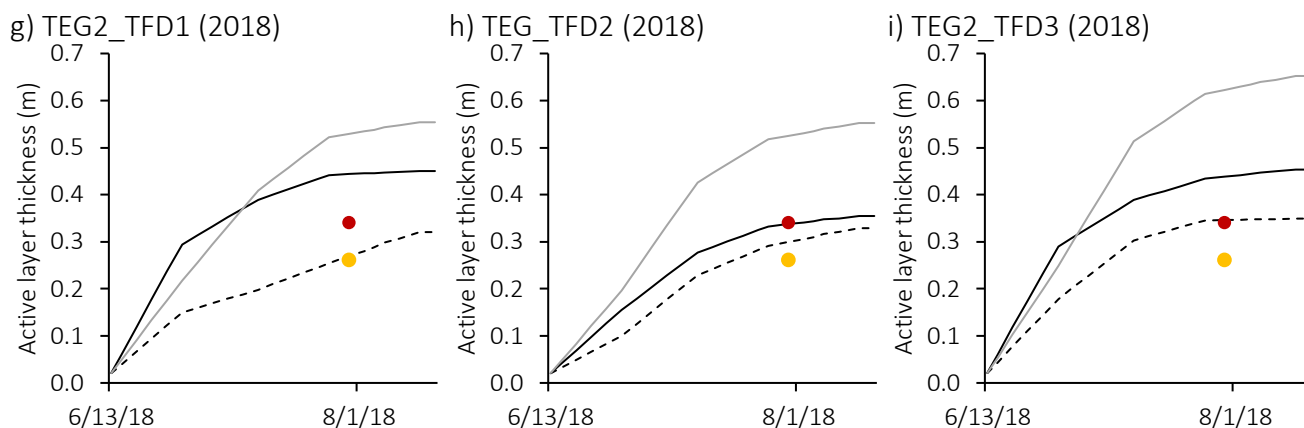

190 **Figure 4. Thaw front depth (TFD) measured in 2017 (13 June to 29 July) and 2018 (12 June to 16 August) in cross-sectional**  
**transects of the thermo-erosion gullies (TEG; curves) and TFD calculated from ground temperature measurements (red and**  
**yellow dots). a) and b) TEG1\_TFD1, near subsite TEG1-3, in 2017 and 2018, respectively, c) and d) TEG1\_TFD2, near subsite**  
**TEG1-2, in 2017 and 2018 respectively, e) TEG1\_TFD3, about 40 m upstream of TEG1\_TFD2, f) TEG1\_TFD4, about 90 m**  
195 **upstream of TEG1\_TFD2, g) TEG2\_TFD1, along the transect of the cores, h) TEG2\_TFD2, about 400 m upstream of**  
**TEG2\_TFD1, and i) TEG2\_TFD3, about 640 m upstream of TEG2\_TFD1. See figure 1 for the position of the TFD transects.**

## 4.2 Soil profiles

The generalized stratigraphy of the cores at TEG1 showed that permafrost was characterized by silty sand or sandy silt sediment, with a larger proportion of peaty material than at TEG2 (Figure 5). There were also some gravelly sediment in cores TEG1-1<sub>Undist</sub> and TEG1-1<sub>Slope</sub>. OMC values varied between 3.1% and 47.8%, and the OMC weighted averages of each core varied between 5.6% and 20.0%. At TEG2, the cores were largely dominated by sandy silt sediment, sometime with peaty material (Figure 6). OMC values of the different strata varied between 4.0% and 25.0%, but the weighted averages of each core remained between 6.2% and 15.3% (Table 1). In general, there were more peaty sediment in the undisturbed and drained polygons than in the slopes and the bottom of the TEG.

A total of 10 main cryostructures were identified in the cores of both TEG: interstitial (pore ice not visible to the unaided eye), interstitial visible (pore ice visible), crustal, ice veins, layered, lenticular (includes micro-lenticular cryostructures and non-parallel ice lenses), isolated ice lens, organic matrix (ice-saturated peat), reticulate, and suspended (Figures 5 and 6, Table 2). Reticulate, suspended, organic matrix, and layered cryostructures accounted for 75.3% of the total length of all cores, while the seven other cryostructures covered the remaining length. Most of the cryostructures predominantly developed in sandy silt sediment (Table 2 and Supplementary table 2), except for crustal (silty sandy gravel) and interstitial/interstitial visible (silty sand) cryostructures. The poorly defined sections corresponded to transitional cryostructures, often composed of organic matter unevenly mixed with mineral sediment. VIC within cryostructures varied between 28.9% and 100.0%, and the VIC range (max-min) of the cryostructures averaged 27% (Table 2). The layered and reticulate cryostructures showed the widest VIC ranges (respectively 52.2% and 46.2%). VIC<sub>wa</sub> of all cores ranged between 47.0% and 81.5% and averaged 69.3% (Table 1). There was no statistical difference (p-value>0.05) in VIC<sub>wa</sub> between the TEG1 and TEG2, between any of the sub-sites, or between the positions of the cores. Cores in undisturbed polygons (TEG1-



1-2-3<sub>Undist</sub>, TEG2-1-2<sub>Undist</sub>) were mostly composed of layered, organic matrix, and reticulate cryostructures (Supplementary table 3). Cores in drained polygons (TEG1-1-2-3<sub>Drained</sub>, TEG2-1-2<sub>Drained</sub>) showed similar cryostructures, as well as some ice enrichment closer to the surface. In the slopes of the gullies, the cores (TEG1-1-2-3<sub>Slope</sub>, TEG2-1-2-3<sub>Slope</sub>) often displayed inclined layers of sediment/ice/air bubbles and were dominated by the reticulate cryostructure.

220 **Table 1.** Weighted average and range (minimum/maximum) of volumetric ice content (VIC) and organic matter content (OMC) down to a depth of 1 m (excluding the surface thawed layer) for the two thermo-erosion gullies (TEG1 and TEG2) and for each borehole.

| Borehole                  | VIC (%)           |      |       | OMC (%)           |     |      |
|---------------------------|-------------------|------|-------|-------------------|-----|------|
|                           | VIC <sub>wa</sub> | Min  | Max   | OMC <sub>wa</sub> | Min | Max  |
| TEG1                      | 65.5              | 28.9 | 100.0 | 13.2              | 3.1 | 47.8 |
| TEG1-1 <sub>Undist</sub>  | 47.9              | 28.9 | 67.1  | 5.6               | 4.5 | 7.9  |
| TEG1-2 <sub>Undist</sub>  | 70.5              | 49.7 | 90.0  | 12.7              | 9.8 | 15.7 |
| TEG1-3 <sub>Undist</sub>  | 75.4              | 55.8 | 100.0 | 17.9              | 3.8 | 27.6 |
| TEG1-1 <sub>Drained</sub> | 61.5              | 44.6 | 87.3  | 13.9              | 4.8 | 38.3 |
| TEG1-2 <sub>Drained</sub> | 75.1              | 36.8 | 100.0 | 14.8              | 7.0 | 36.6 |
| TEG1-3 <sub>Drained</sub> | 63.0              | 47.8 | 90.4  | 11.4              | 3.1 | 31.6 |
| TEG1-1 <sub>Slope</sub>   | 63.8              | 48.0 | 100.0 | 11.3              | 3.5 | 33.8 |
| TEG1-2 <sub>Slope</sub>   | 64.2              | 40.7 | 89.8  | 20.0              | 7.7 | 47.8 |
| TEG1-3 <sub>Slope</sub>   | 63.7              | 46.6 | 79.2  | 10.0              | 9.5 | 10.4 |
| TEG2                      | 74.2              | 49.7 | 100.0 | 10.3              | 4.0 | 25.0 |
| TEG2-1 <sub>Undist</sub>  | 72.7              | 49.7 | 88.3  | 10.5              | 8.0 | 16.0 |
| TEG2-2 <sub>Undist</sub>  | 79.7              | 64.2 | 87.1  | 15.3              | 4.0 | 25.0 |
| TEG2-1 <sub>Drained</sub> | 74.5              | 62.4 | 100.0 | 12.8              | 8.0 | 18.0 |
| TEG2-2 <sub>Drained</sub> | 77.0              | 64.2 | 89.3  | 9.4               | 6.0 | 14.0 |
| TEG2-1 <sub>Slope</sub>   | 71.5              | 51.3 | 88.3  | 11.8              | 7.0 | 17.0 |
| TEG2-2 <sub>Slope</sub>   | 81.4              | 67.9 | 88.4  | 8.1               | 7.0 | 9.0  |
| TEG2-3 <sub>Slope</sub>   | 68.7              | 57.7 | 73.8  | 6.2               | 5.0 | 8.0  |
| TEG2 <sub>BGC</sub>       | 64.2              | 51.2 | 74.0  | 6.4               | 4.5 | 9.8  |

#### 4.2.1 TEG1

225 Cores at had VIC<sub>wa</sub> values ranging between 47.9% and 75.4% and averaged 65.5% (Figure 5 and Table 1). The cores extracted from undisturbed polygons varied in soil composition, stratigraphy, and cryostratigraphy (Figure 5a). TEG1-1<sub>Undist</sub> contrasted with the other undisturbed cores due with its top layer of sandy gravel and by having the lowest VIC<sub>wa</sub> (47.9%). The gravelly sediments were characterized by crustal cryostructures, and ice casts of some of the stones were visible, directly below them (e.g., ice lens at 47-48 cm deep). TEG1-2<sub>Undist</sub> was composed of layers of sandy silt and silty sand with a peaty inclusion (organic matrix cryostructure) at 63-78 cm. There were ice-rich layers above and below the peaty inclusion at 31-230 63 cm and 88-115 cm. TEG1-3<sub>Undist</sub> was characterized by a top half organic layer (organic matrix cryostructure) in silty sand sediment overlying a bottom half of mineral sediment with a layered cryostructure. The ice layers of this cryostructure increased in thickness as the sediment changed from silty sand (62 to 90 cm) to sandy silt (>90 cm).



235 **Table 2. Weighted average volumetric ice content ( $VIC_{wa}$ ), total proportion, and proportion of the dominant soil compositions of each cryostructure identified. The total proportions were calculated by dividing the total length of a cryostructure by the total length of the cryostructures, and the proportions of the dominant soil compositions were calculated by dividing the total length of a type of sediment within a cryostructure by the total length of the cryostructure. Only VIC values falling within one cryostructure (i.e., not sections overlapping two or more cryostructures) were used in the total proportion to obtain representative values.**

| Cryostructure        | VIC (%)    |      |       | Total proportion (%) | Proportion of the dominant soil composition (%) |
|----------------------|------------|------|-------|----------------------|-------------------------------------------------|
|                      | $VIC_{wa}$ | Min  | Max   |                      |                                                 |
| Ice veins            | 76.8       | 76.0 | 79.8  | 0.9                  | Sandy silt (100%)                               |
| Isolated ice lens    | 95.2       | 84.3 | 100.0 | 1.9                  | Sandy silt (74%), sandy silt peaty (12%)        |
| Lenticular           | 52.8       | 49.7 | 55.5  | 2.1                  | Sandy silt (100%)                               |
| Crustal              | 42.8       | 28.9 | 56.3  | 2.5                  | Silty sandy gravel (81%)                        |
| Interstitial         | 50.7       | 44.6 | 57.7  | 4.3                  | Silty sand (68%), sandy silt (30%)              |
| Poorly defined       | 64.1       | 36.8 | 76.1  | 5.1                  | Sandy silt (61%), silty sand peaty (22%)        |
| Interstitial visible | 59.0       | 46.6 | 84.1  | 7.9                  | Silty sand (79%), sandy silt (15%)              |
| Suspended            | 81.8       | 70.0 | 100.0 | 13.2                 | Sandy silt (68%), silt (15%)                    |
| Layered              | 71.9       | 47.8 | 100.0 | 17.4                 | Sandy silt (63%), silty sand (37%)              |
| Organic matrix       | 77.3       | 55.5 | 88.6  | 18.5                 | Sandy silt peaty (60%), silty sand peaty (40%)  |
| Reticulate           | 69.3       | 54.6 | 97.2  | 26.2                 | Sandy silt (85%)                                |

240

In drained polygons, the stratigraphic layers were mostly composed of silty sand and sandy silt, sometimes peaty (Figure 5b). TEG1-1<sub>Drained</sub> was composed of sandy silt and silty sand layers with peaty inclusions at the surface and at 66-79 cm. Most of the core was characterized by interstitial and organic matrix cryostructures, except for an ice-rich layer (suspended cryostructure) at 55-66 cm. TEG1-2<sub>Drained</sub> showed an ice-rich layer (suspended, reticulate cryostructures) at 44-88 cm with peaty (organic matrix cryostructure) sediment directly below it and at the surface of the core. The sediment in the suspended cryostructure was almost entirely composed of silt. TEG1-3<sub>Drained</sub> was mostly composed of silty sand. Organic layers (organic matrix cryostructure) were observed both at the top and the bottom of the core. In the center, the only section composed of sandy silt was characterized by a layered cryostructure.

245

Cores from the gully slopes showed contrasting stratigraphy and cryostratigraphy (Figure 5c). TEG1-1<sub>Slope</sub> was composed of three main sections: a top section (4-28 cm) with peaty-silty-sandy sediments, a middle section (28-68 cm) with silty sand sediment showing some cross-stratification, and a **bottom section** with coarser gravelly-silty-sandy sediments. The top section was characterized by an organic matrix cryostructure, the middle section by mostly interstitial visible cryostructures, and the bottom section by mostly reticulate cryostructures. TEG1-2<sub>Slope</sub> displayed a thick ice lens at 110-120 cm separating the bottom silty sand sediment from the sandy silt sediment above and including a few oblique streaks of bubbles (<0.5 cm). The bottom sandy sediment was characterized by horizontal and cross-stratification at 120-135 cm (interstitial visible), and inclined stratification (>135 cm) with layered cryostructure aligned with the stratification plane. Above the ice lens and up to 78 cm deep, the sediments and the cryostructures were inclined. TEG1-3<sub>Slope</sub> contrasted with the two other cores by being more uniform in soil composition and cryostructures. Except at the top of the core (<36 cm),

255



260 TEG1-3<sub>Slope</sub> was entirely composed of reticulate cryostructures in sandy silt sediment. Starting at 76 cm, the sediment/ice layers were inclined.

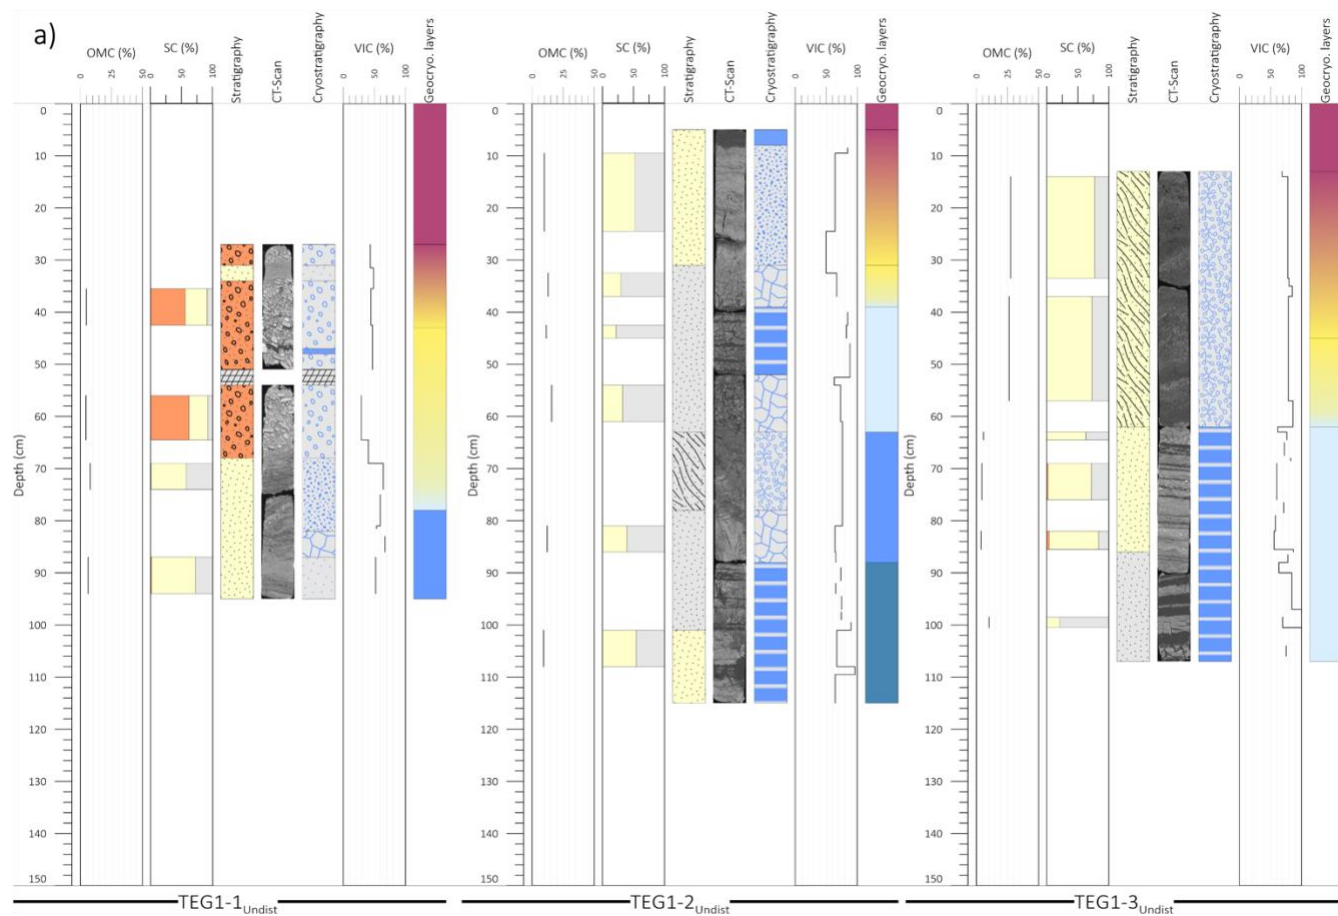

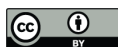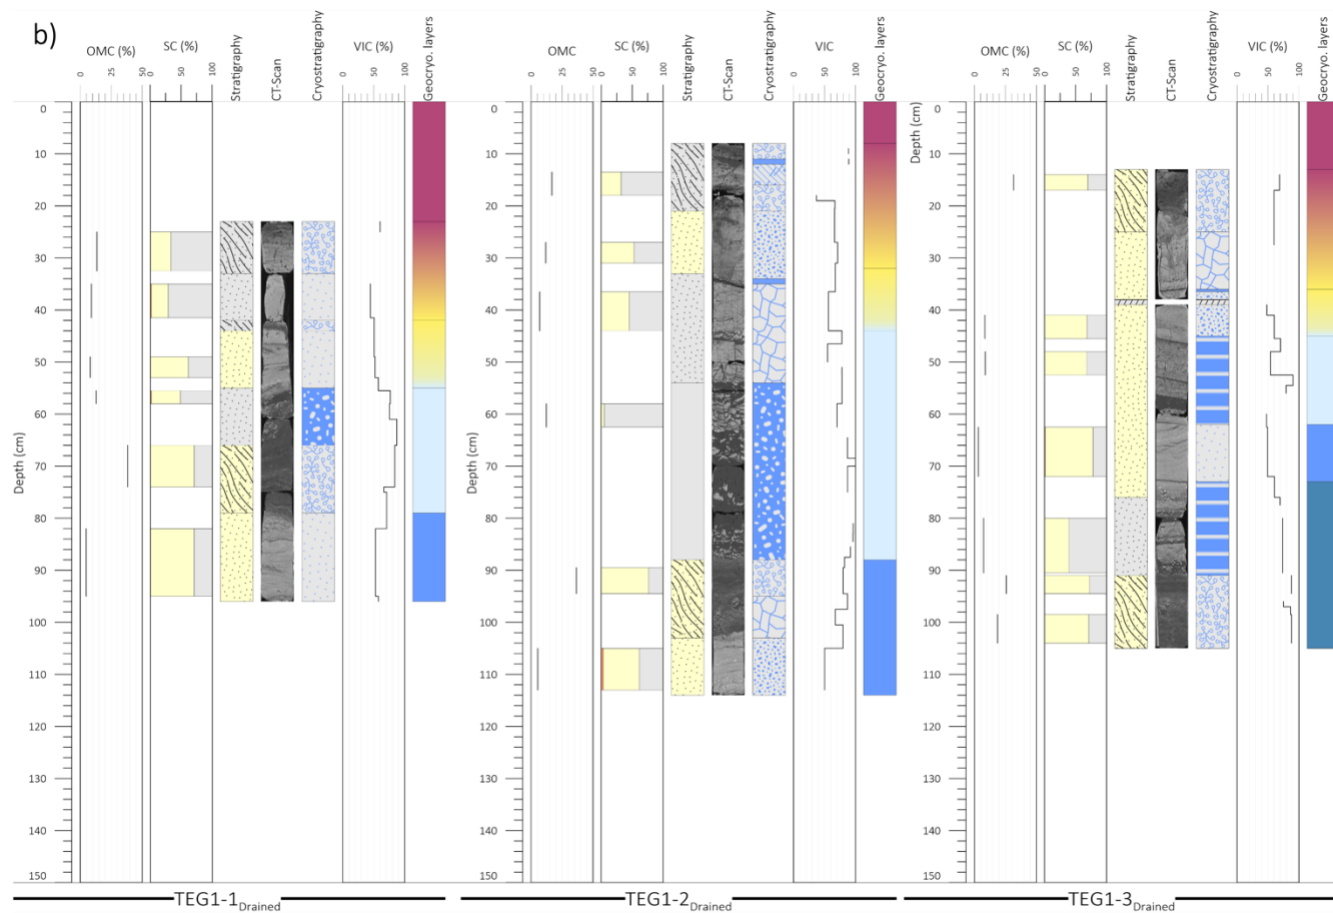

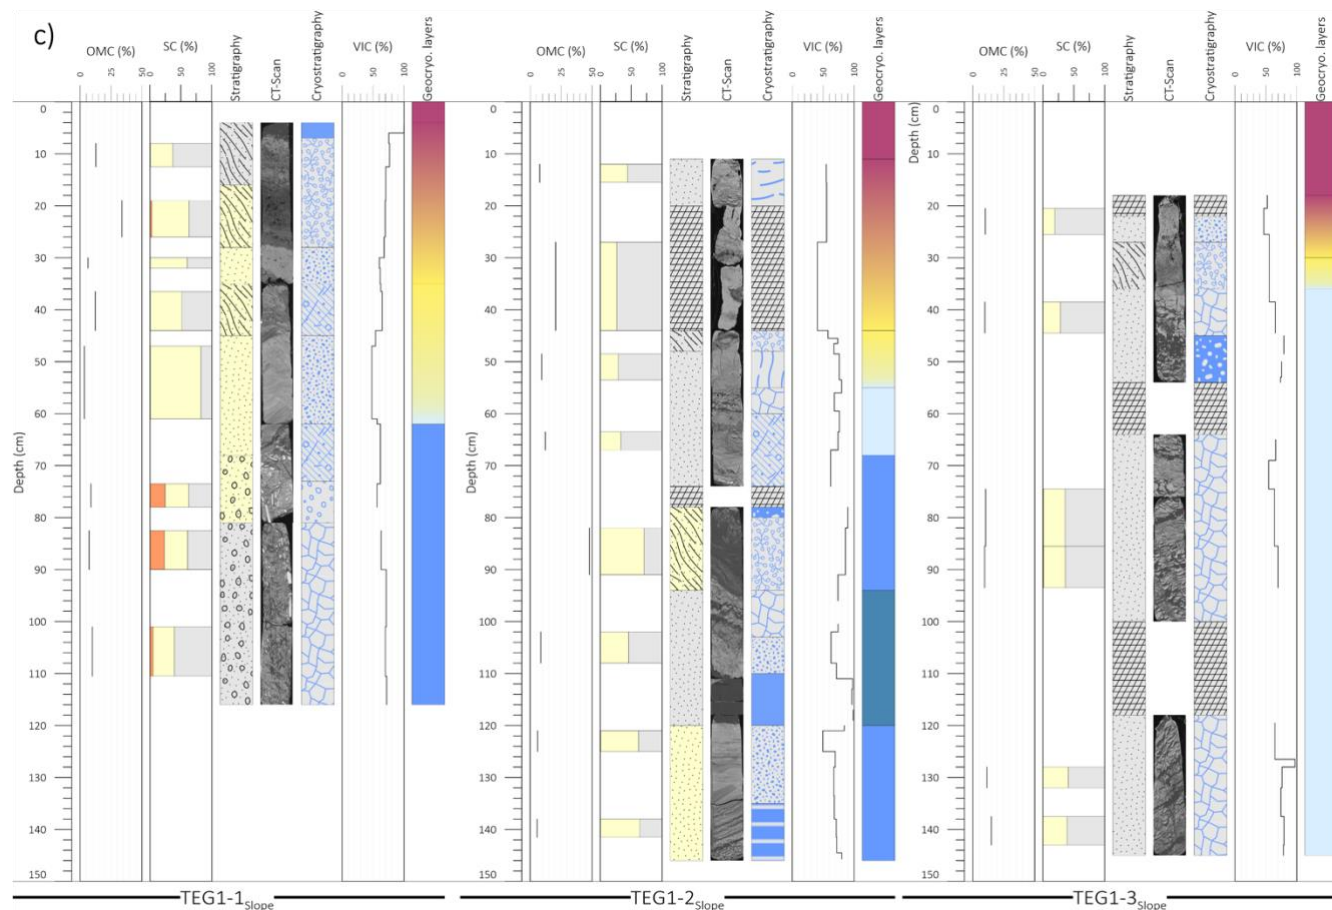

265 **Figure 5. Organic matter content (OMC; %), soil composition (SC; %gravel, %sand, %silt), soil stratigraphy, CT-scan imagery, soil cryostratigraphy, volumetric ice content (VIC; %), and geocryological layers for the cores at TEG1. a) Cores in undisturbed polygons, b) cores in drained polygons, and c) cores in slopes of TEG1. While delineations were used to mark the transitions between the frozen part of the active layer, the transient layer, and the intermediate layer, color gradients were also used to denote the uncertainty in the limits between these layers. Refer to figure 6 for the legend.**

#### 4.2.1 TEG2

270 Cores at TEG2 had  $VIC_{wa}$  values ranging between 64.2% and 81.4% and averaged 74.2% (Figure 6; Table 1). TEG2-1<sub>Undist</sub> and TEG2-2<sub>Undist</sub> were mostly composed of sandy silt with some layers of peaty sandy silt (Figure 6a). TEG2-1<sub>Undist</sub> was characterized by a succession of organic layers (organic matrix) underlain by ice-rich layers (suspended, reticulate, layered). Similarly, TEG2-2<sub>Undist</sub> was dominated by an organic matrix cryostructure in the top section (13-52 cm) underlain by an ice-rich (suspended cryostructure) layer (61-81 cm) in sandy silt above a layered cryostructure with thin ice lenses in silty sand.

275 In drained polygons (TEG2-1<sub>Drained</sub>, TEG2-2<sub>Drained</sub>), the stratigraphic layers were mostly composed of sandy silt, sometimes peaty (Figure 6b). Both cores were characterized by an ice-rich layer (ice lens, suspended, reticulate, layered cryostructures) near the top of permafrost, a middle section with organic-rich sediment (organic matrix cryostructure), and a bottom section characterized by more developed cryostructures (layered, reticulate, ice lens) and ice lenses.



In the gully slopes, while TEG2-2<sub>Slope</sub> and TEG2-3<sub>Slope</sub> were entirely composed of sandy silt, TEG2-1<sub>Slope</sub> also  
280 contained peaty sections (Figure 6c). In TEG2-1<sub>Slope</sub>, it was possible to see alternation of peaty sediment (organic matrix  
cryostructure) and ice-rich (suspended, reticulate, layered cryostructures) sandy silt sediment. TEG2-2<sub>Slope</sub> was dominated by  
ice-rich cryostructures (layered, reticulate, suspended) transitioning from one to the other. The reticulate and layered  
cryostructures were well-developed, i.e., had high VIC values and were characterized by thick ice inclusions (and vice versa  
for poorly-developed). TEG2-3<sub>Slope</sub> was dominated by reticulate cryostructures, though they were often poorly-developed.  
285 The layered cryostructures at the bottom of the core were very clearly defined. Oblique streaks of bubbles (<1.5 cm) were  
found in the suspended and reticulate cryostructures of the slope cores, i.e., parallel to the slope surface.

Finally, the stratigraphy of core at the bottom of the gully channel (TEG2<sub>BGC</sub>) contrasted with the other cores of  
TEG2 with more sandy sediments and some gravel at the bottom of the core (Figure 6d). The core had the lowest VIC<sub>wa</sub> of  
all cores at TEG2 (Table 1), though this only included the top 40 cm of the core, which was not representative of deeper  
290 layers where ice-rich cryostructures (reticulate, suspended, layered) were found. Starting at 192 cm deep, inclined layers of  
coarser sediments formed inclined cryostructures.

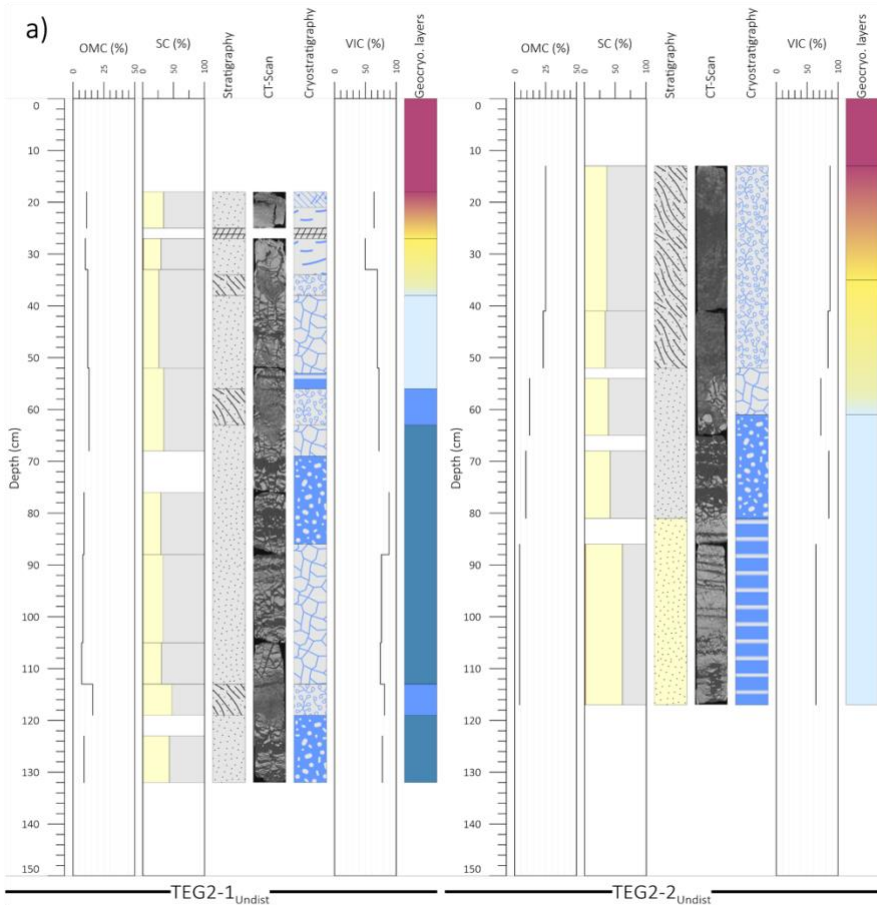



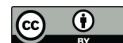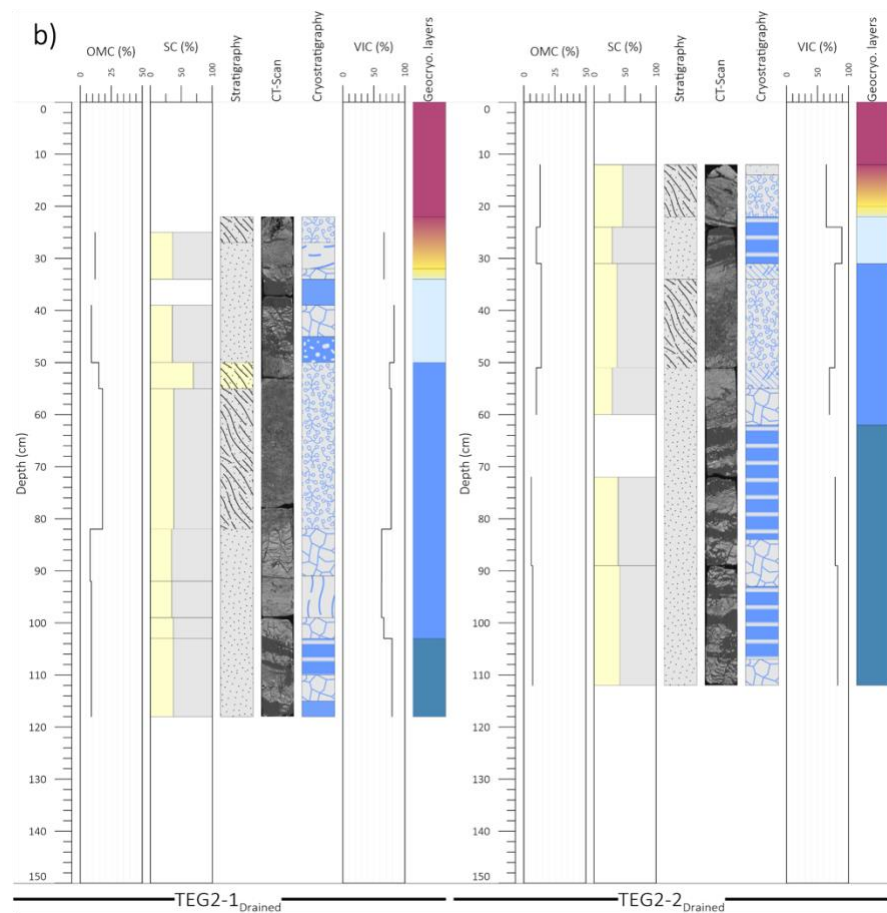

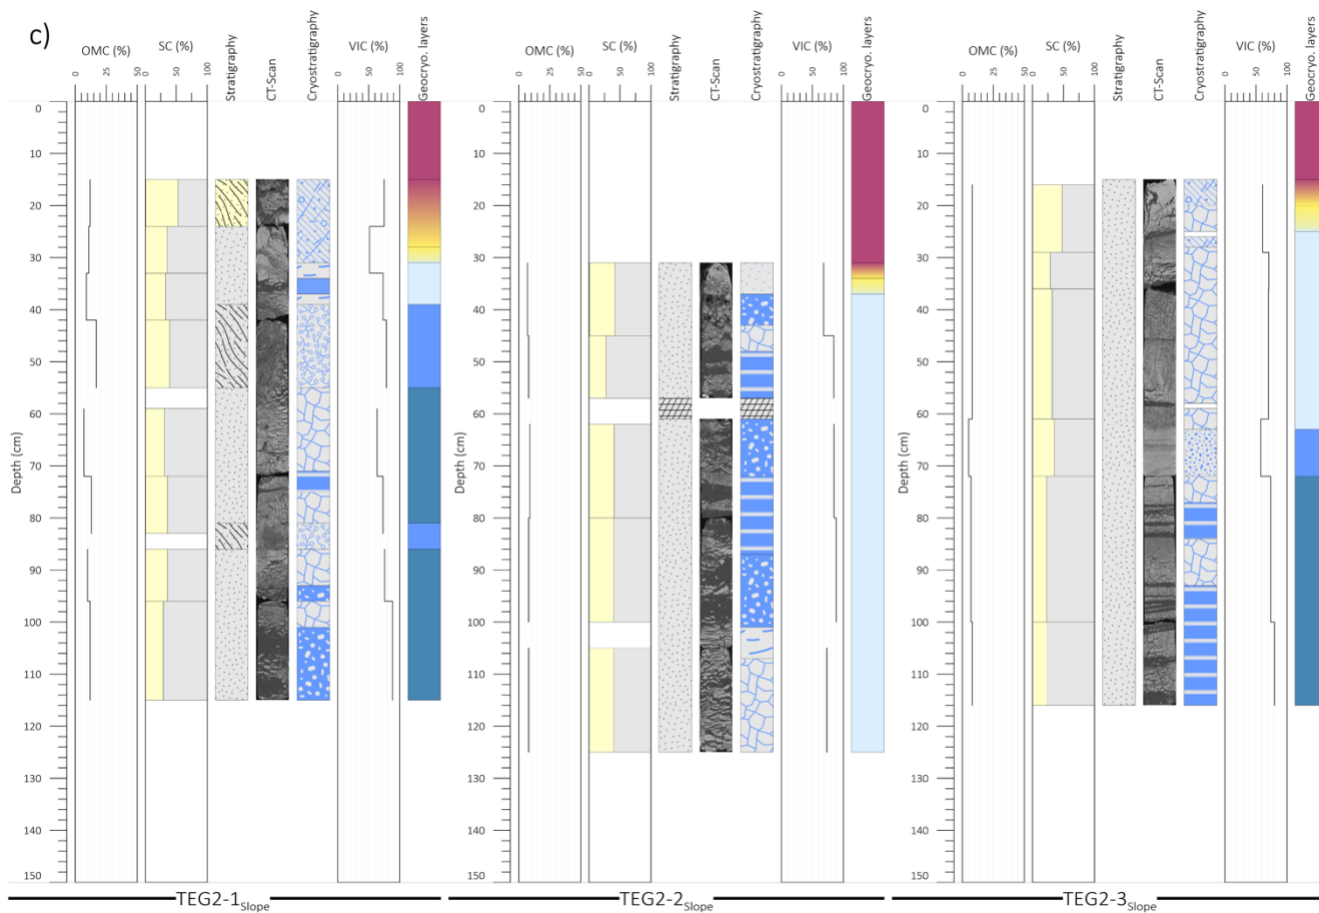

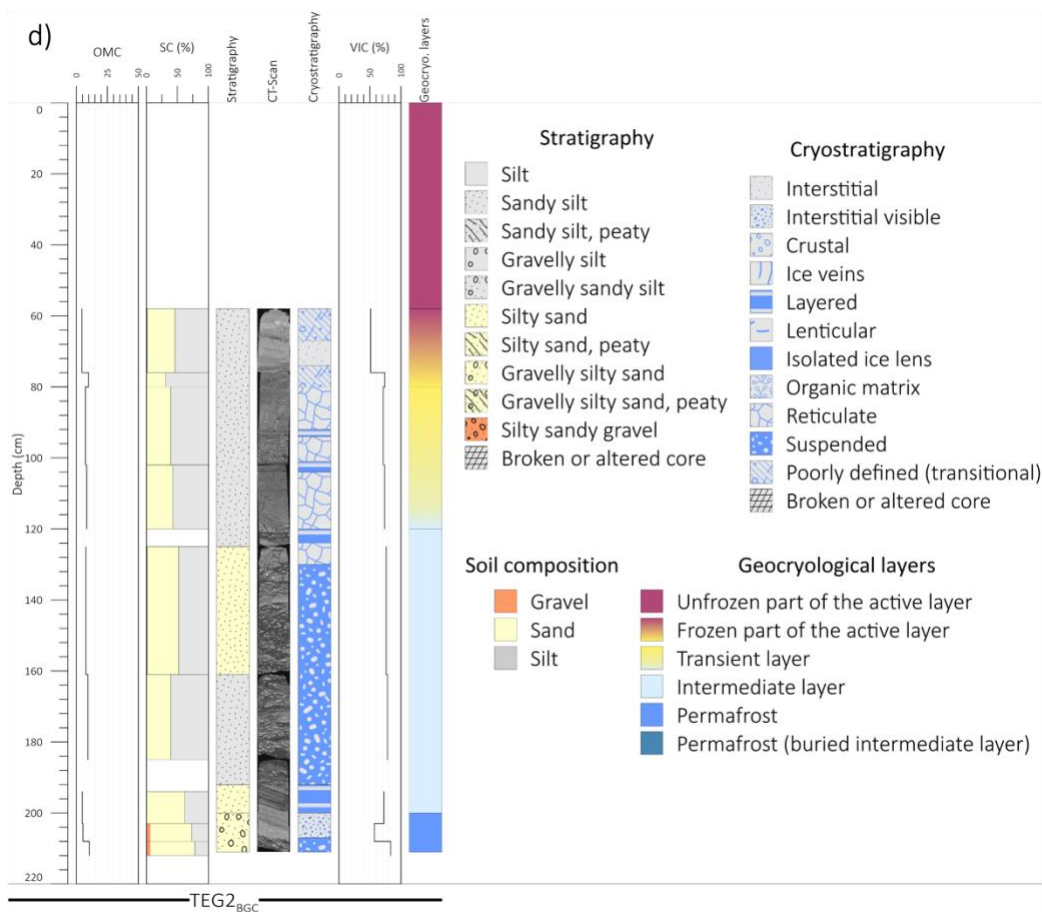

295

**Figure 6. Organic matter content (OMC; %), soil composition (SC; %gravel, %sand, %silt), soil stratigraphy, CT-scan imagery, soil cryostratigraphy, volumetric ice content (VIC; %), and geocryological layers for the boreholes at TEG2. a) Cores in undisturbed polygons, b) cores in drained polygons, c) cores in slopes of TEG2, and d) core at the bottom of the gully channel of TEG2. While delineations were used to mark the transitions between the frozen part of the active layer, the transient layer, and the intermediate layer, color gradients were also used to denote the uncertainty in the limits between these layers.**

300

## 5. Discussion

### 5.1 Cryostratigraphy

#### 5.1.1 Cryostructures

Our results show that the development of cryostructures was largely influenced by soil composition and the stratigraphic sequences. The cold climate and permafrost at our study site also significantly affected freezing processes and thus the formation of the cryostructures. Here we present a more detailed description of four out of 11 cryostructures as those four accounted for 76% of all cryostructures occurrences while most of the other ones accounted for <5%.

305



The reticulate cryostructure was the most abundant one and formed almost exclusively in sandy silt, resulting in  $VIC_{wa}$  similar to what others have reported (Kanevskiy et al., 2013; Shur et al., 2021; Thévenin, 2023). Since permafrost in the study area is syngenetic, reticulate cryostructures likely formed by the hydraulic fracturing of the sediment ahead of an advancing freezing front followed by infilling of the resulting fractures with expelled and pressurized pore water (McRoberts and Nixon, 1975). Layered cryostructures formed in both predominantly silty (62%) and sandy (38%) sediments, though more well-developed (thicker) ice layers were generally found in silty sediment (e.g., TEG1-3<sub>Undist</sub>), reflecting how ice segregation was facilitated in finer sediments. They likely formed due to prolonged periods of ice segregation when the thaw front was stationary and water was available, mirroring sediment deposition patterns, and consistent with syngenetic permafrost (French and Shur, 2010). Both the reticulate and layered cryostructures had a wide VIC range. While all cryostructures showed some variability in VIC, the reticulate and layered cryostructures were the most affected because of the variability in the thickness of the ice lattices (reticulate) or lenses (layered). Depending on the saturation of the host sediments, those cryostructures can be observed as much in ice-rich sediments as in sediment-poor ice in permafrost and reflect the surface conditions (e.g., water availability) during their formation (Paquette et al., 2022).

Except for the isolated ice lenses, the suspended and organic matrix cryostructures had the highest  $VIC_{wa}$ . The suspended cryostructure predominantly (>80%) formed in silty sediment, which is consistent with ice segregation during periods of rapid sedimentation of fine sediments and sustained water availability (Murton, 2013). Suspended cryostructures were often found with grading cryostructures (e.g., reticulate, layered) before and/or after them leading to lower VIC. This suggests an acceleration and/or slowing down of ice segregation and thus of sedimentation during their formation, or that two freezing fronts contributed to the formation of the cryostructures. Organic matrix cryostructures were found in similar proportions in peaty sandy silt (60%) and peaty silty sand (40%), thus making the presence of organic material rather than a specific **sediment size** the main factor of formation.

### 5.1.2 Cryostratigraphic patterns

Most of the cryostructures in this study developed with syngenetic permafrost aggradation, irrespective of their position with regards to the TEG. In general, we observed that the inclusion of organic matter in the soil profiles largely affected the cryostratigraphy due to the peaty material promoting ice aggradation below it. This was observed in cores from both TEG where it was common to see suspended, reticulate, layered, and isolated ice lens cryostructures either directly or 10-20 cm below the organic matter inclusion. This suggests that when organic matter accumulated, the top of permafrost not only moved up due to the new material accumulating (syngenetic permafrost growth), but also because of the low thermal conductivity of organic matter compared to mineral sediment (Andersland and Ladanyi, 2004), which promoted ice enrichment in the layers below. Organic layers at depth also promoted ice enrichment in the mineral sediment above them by slowing down the progression of the thaw front and thus facilitating ice segregation.

The cryostratigraphy of the cores in undisturbed polygons (except TEG1-1<sub>Undist</sub>) reflected the conditions during permafrost formation, i.e., reticulate, layered, and suspended cryostructures forming in fine-grained aeolian sediment



coupled with layers of organic layers promoting ice enrichment below them. Some of the cores in drained polygons (TEG1-<sub>3Drained</sub>, TEG2-1<sub>Drained</sub>, TEG2-2<sub>Drained</sub>) also showed an ice-rich layer closer to the surface than in undisturbed polygons, which we attribute to permafrost aggradation after polygon drainage. This is supported by our TFD measurements at TEG1 showing shallower TFD on the shoulders of the TEG, by Godin et al. (2016) who noted that drained polygons had a thinner active layer causing upward (syngenetic) permafrost aggradation, and by Veillette's (2019) results showing general uplifting of the drained polygons along TEG2. In the slopes, the high values of TFD at TEG1 showed that after formation of the TEG, the slopes experience greater thawing than in **natural** conditions. This can be explained by the lack of vegetation protecting the ground surface from air convection and solar radiation which, after vegetation colonization, is substantially reduced. This is supported by the TFD at TEG2 where the slopes have values similar to undisturbed conditions. The oblique streaks of bubbles and inclined ice layers indicated that the permafrost table moved up following an inclined plane likely parallel to the slope surface during permafrost aggradation. For the core at the bottom of the gully channel, the stratigraphy and cryostratigraphy suggest that after the initial accumulation of coarser alluvial sediment, finer alluvial sediment accumulated relatively quickly, which led to rapid ice segregation.

Based on the type of cryostructure (e.g., suspended, well-developed reticulate) and their high VIC, we estimate that permafrost was able to re-aggrade relatively quickly and with sufficient water following stabilization of the TEG. We attribute this to the low permafrost temperatures of the study site (Allard et al., 2020), which promoted permafrost aggradation upward following TEG stabilization. There was ice enrichment in all sections affected by the TEG (drained, slope, bottom of the gully channel), which led to ice contents similar to undisturbed conditions. Though there was no statistical difference in  $VIC_{wa}$  between the position of cores in the TEG, between the TEG or between the sub-sites, some patterns deserve attention. First, looking at the cryostratigraphy beyond 1 m deep shows that re-aggradation of cold permafrost following a disturbance may lead to ice enrichment, i.e., the recovery from the disturbance may lead to more ice than initially. It is also possible that permafrost recovery leads to ice enrichment in more concentrated layers instead of throughout the entire permafrost column near the surface. However, new deeper cores would be necessary to confirm this. Second, drainage of the polygons bordering the TEG could also cause ice enrichment, specifically near the surface. This could be a stabilization mechanism preventing further TEG enlargement. Finally, the slope cores had less peaty/organic material than at other positions because it was likely eroded away during the formation of the TEG. Although permafrost re-aggradation promoted ice enrichment in the mineral sediment, the slopes are now prone to greater thaw subsidence as organic material requires an external load to cause thaw settlement comparable to mineral soil with similar VIC (Kanevskiy et al., 2012).

### 370 5.1.3 Geocryological layers

All cores were characterized by a transient layer, which we expected because it is the result of the interannual variations in the **ALT** and all sites experience it (Shur, 1988; Shur et al., 2005; French and Shur, 2010). Most of the cores were interpreted to have an intermediate layer, except for TEG1-1<sub>Undist</sub> and TEG1-1<sub>Slope</sub>. Those two cores were both characterized by coarser



sediments than in other cores, resulting in higher hydraulic conductivities and therefore less water to form ice-rich layers.  
375 The average depth of the top of the intermediate layers from cores in drained polygons and slopes was shallower than in  
undisturbed conditions, especially in the slope cores where the intermediate layers were also thicker. In drained polygons,  
this is consistent with the permafrost table moving up after the formation of a TEG causing drainage of the bordering  
polygons and their uplifting. For the slopes and TEG<sub>2BGC</sub>, the increased thickness of the combined transient and intermediate  
layers suggests that permafrost recovery following TEG stabilization can increase permafrost resilience to thawing compared  
380 to **natural** conditions. They form a protective layer against annual thawing that would require a strong disturbance at the  
surface to be degraded (Kanevskiy et al., 2016, 2017) and thus contribute to the long-term stabilization of the TEG.

Finally, buried intermediate layers were interpreted in most of the TEG<sub>2</sub> cores, but only in TEG<sub>1-2Undist</sub>, TEG<sub>1-2Slope</sub>, and TEG<sub>1-2Drained</sub> at TEG<sub>1</sub>. Those intermediate layers were interpreted as buried because they represented different  
sequences of permafrost aggradation. In most cases, the buried intermediate layers were located under a layer of organic  
385 sediment, which promoted ice-enrichment in the mineral sediment below. Then, new mineral sediment accumulated over the  
organic layer and were part of the active layer, until organic matter started to accumulate again. This resulted in the gradual  
decrease in active layer thickness, i.e., permafrost aggradation and formation of aggradational ice (Mackay, 1972; Burn,  
1988; French and Shur, 2010), which led to the formation of a new intermediate layer in the mineral sediment below the  
newly accumulated organic matter.

## 390 **5.2 Landscape evolution following thermo-erosion gullyng**

By investigating **a recent** and a stable TEG in the High Arctic, we were able to identify and characterize the main processes  
of formation and stabilization of a TEG and the long-term impacts of thermal erosion in ice-rich polygonal tundra. We  
summarize these processes in a conceptual model describing three main stages of TEG formation and stabilization in our  
study area (Figure 7). The following sections describe each stage in detail.

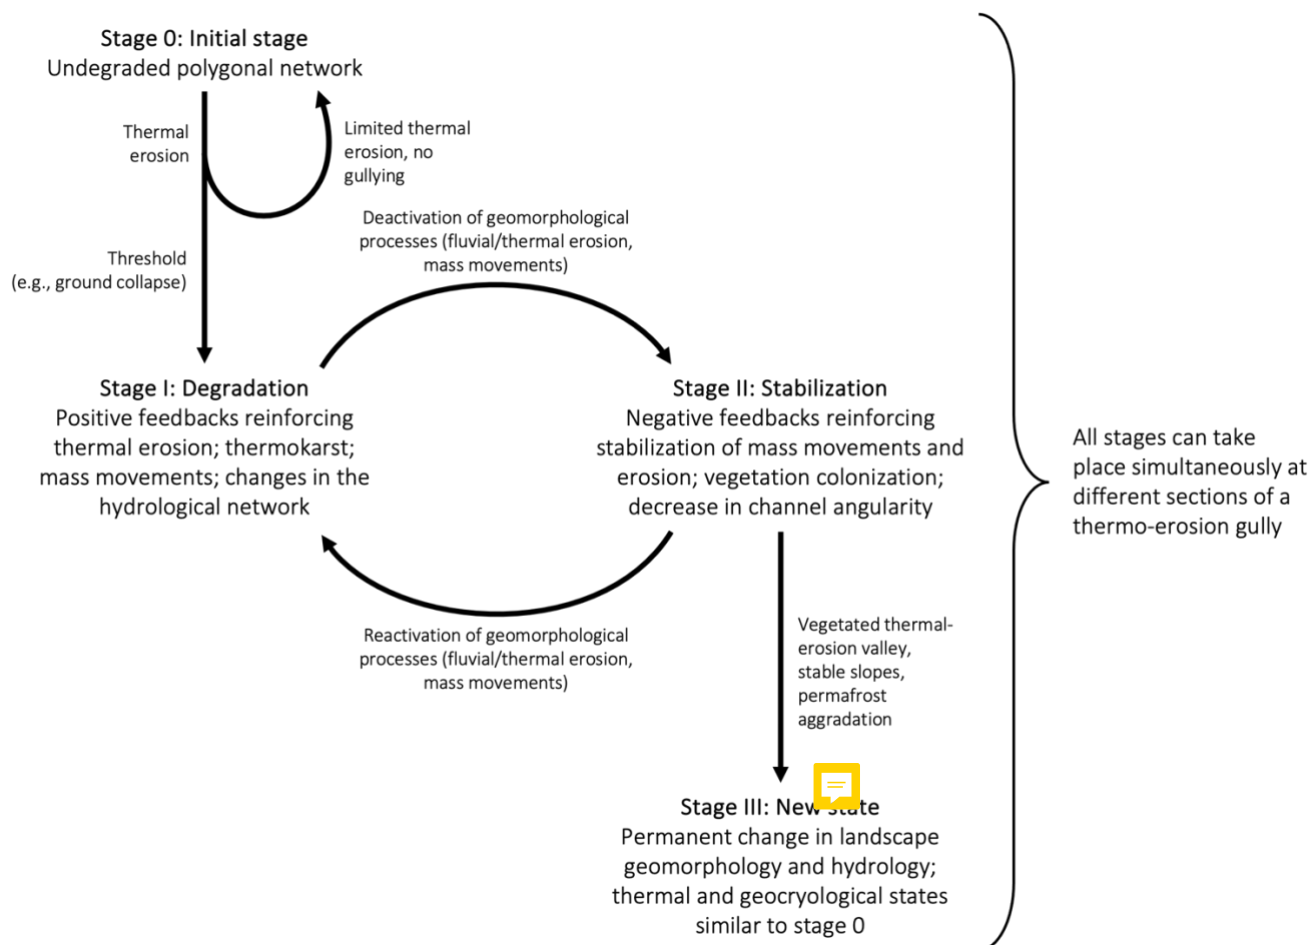

395

**Figure 7. Conceptual model of thermo-erosion gully (TEG) evolution in cold permafrost. At stage 0, the polygonal network has well-developed ice wedges that can withstand some thermal erosion, until a threshold is surpassed and causes a TEG to form. At stage I, the thermal regime and geomorphological processes are in disequilibrium, which causes high rates of degradation. As the TEG reaches new thermal, hydrological, and geomorphological equilibria, geomorphological processes slow down, and stabilization begins. At stage II, stabilization takes place and the channel angularity gradually decreases. However, hydrological disturbances and changes in environmental conditions can reactivate geomorphological processes and cause further stage I degradation as the lack of a developed intermediate layer reduces the capacity of permafrost to withstand disturbances. If stabilization persists, the TEG enters a new state of the periglacial landscape. At stage III, the TEG is stabilized, and even though the permafrost thermal regime and ground ice content have recovered to conditions similar to stage 0, the TEG has caused long-lasting geomorphological and hydrological changes to the landscape.**

400

405

### 5.2.1 Stage 0: Undisturbed polygonal network

In areas with cold continuous syngenetic permafrost where thick transient and intermediate layers have developed, permafrost is well-protected against interannual climatic variations and meteorological events (Kanevskiy et al., 2017; Shur et al., 2005). Indeed, the infiltration of surface runoff water from snowmelt, summer precipitation, or thawing permafrost (French, 2007) into open thermal contraction cracks and other types of cavities followed by thermal erosion of permafrost and ice wedges may be occurring on an annual basis, but not necessarily lead to gullying (Figure 7, Stage 0). The transient

410



and intermediate layers act as buffers against disturbances due to the high latent heat of fusion of ice (Jorgenson et al., 2010; Andersland and Ladanyi, 2004), and cold permafrost promotes rapid recovery. However, a change in surface conditions (e.g., polygon drainage), a disturbance (e.g., heavy rainfalls, above average snow accumulation leading to increased snowmelt, catastrophic lake drainage), or a shift in climate conditions (e.g., more precipitations, warmer air temperatures increasing permafrost temperature) can trigger additional runoff and increase the power of thermal erosion, eventually surpassing a threshold (e.g., tunnel collapse) and forming a TEG (Figure 7, Stage I).

### 5.2.2 Stage I: Degradation and disequilibrium

This first stage of thermo-erosion gullying is characterized by major geomorphic, hydrological, and thermal disequilibria. This transitional stage is unstable and undergoes rapid changes through positive feedbacks caused by thermal erosion of ice wedges and of the channel, thaw slumping, collapse of active layer and tunnel overhangs, slope failure, and mudflows to reach a new equilibrium (Godin and Fortier, 2012b; Godin et al., 2016; Fortier et al., 2007). This translates into a box-shaped channel with unstable slopes and multiple ramifications, sometime forming baydzherakhi. Thermal erosion also progresses vertically into ice wedges and permafrost until it reaches its base level or enough sediment is deposited at the bottom of the newly formed stream (French, 2007). Then, lateral thermal erosion occurs and contributes to enlarge the TEG channels (Morgenstern et al., 2021). Thermokarst mounds become increasingly affected by thermal erosion and thermokarst degradation due to the increased surface area when isolated and are eventually completely eroded from the main channel if erosion persists.

During this stage, sediment export is high because of the active erosion and collapsed material being remobilized downstream in low gradient areas of the TEG channel (Godin and Fortier, 2012b; Rioux, 2020). The uncovered ground material in the TEG becomes exposed to solar radiation and atmospheric heat, which both contribute to erosion, even without running water (i.e., thermal erosion) (Fortier et al., 2007). In addition, the thaw front can penetrate deeper into permafrost due to the lack of protective cover, causing degradation of the transient and intermediate layers of the slopes and bottom of the gully channel.

### 5.2.3 Stage II: Stabilization and transition to a new state

While TEG inception can occur within a single thawing season, it often takes several decades for erosion, mass movement, thermokarst, and sediment export to decrease, at which point stabilization can begin (Figure 7, Stage II). Over time, slope angularity of the TEG decreases (Godin and Fortier, 2010), which contributes to reduce mass movements. In addition, alluvial sediment deposited on the sides of main channel of the TEG can form alluvial levees that reduce gully wall mechanical erosion by water (Godin and Fortier, 2012b). As the slopes become stable and erosion winds down, permafrost re-aggradation takes place and vegetation starts to colonize exposed ground in the TEG. This creates a negative feedback on mass movement and promotes further permafrost aggradation by shielding the ground surface from incoming solar radiation and insulating it from atmospheric heat. The breaching and collapsing of the rims of the polygons encompassing the TEG





also contribute to TEG stabilization (Godin and Fortier, 2012b; Godin et al., 2016). Active-layer and pond drainage of  
445 breached low-centered polygons creates a dry porous top layer with reduced thermal conductivity (Fortier et al., 2007)  
resulting in a thinning of the active layer on the shoulders of the gully. This causes a shift in vegetation (Perreault et al.,  
2016), from wet to mesic, which also contributes to decrease thermal conductivity and active layer thickness, resulting in  
thin transient and intermediate layers form closer to the surface than in undisturbed conditions. This ice enrichment  
contributes to increase the thermal resistance of the encompassing polygons and thus to reduce further widening of the TEG.  
450 It is important to note that not all sections of a TEG are at the same stage simultaneously and that sections of a TEG can go  
back and forth between stages I and II. Once the slopes of the TEG are vegetated and the gully no longer experiences  
erosion, the permafrost environment supporting the TEG reaches a new state.

#### 5.2.4 Stage III: **New state of the periglacial landscape and permafrost resilience**

The formation of TEG has profound impacts on ice-wedge polygonal networks, permanently (at the Anthropocene time  
455 scale) altering landscape morphology and ecosystem functions (Figure 7, Stage III). The stabilized TEG has now evolved  
into a thermo-erosional valley (Morgenstern et al., 2021) characterized by a broad, densely vegetated main channel with  
stable low-angle slopes and limited ramifications. Despite alluvial sedimentation at the bottom of the gully channel, the base  
level of the gully is now lower than the surrounding polygons, thus affecting local hydrological connectivity. **The low-**  
**centered polygons along the margins of the TEG have changed into raised flat/high-centered ones due to their drainage.** The  
460 changes in their thermal properties caused a thinning of the active layer and ground ice aggradation, ultimately raising the  
polygons and further affecting local hydrological patterns.

In this new state, even though the TEG has caused long-lasting geomorphological and hydrological changes to the  
landscape, the permafrost affected by the TEG can recover to conditions similar to undisturbed permafrost pre-dating the  
disturbance, i.e., similar ground ice content and temperature, and thus is resilient. However, permafrost re-aggradation now  
465 leads to the formation of thicker intermediate layers in areas that have been the most disturbed, i.e., the slopes and bottom of  
the gully channel. Thermal contraction cracking can resume following the same pre-disturbance network, causing ice-wedge  
formation or rejuvenation (Lewkowicz, 1994; Gagnon and Allard, 2019). While permafrost shows resilience, the local  
landscape does not because it has surpassed thresholds of recovery to pre-disturbance conditions. From a landscape-  
evolution perspective, this suggests that in stable environmental conditions undergoing natural variability, permafrost is able  
470 to persist longer than the geomorphological landforms in which it forms. This adds to the stabilizing effect of thermal  
erosion on tundra landscapes, which levels gradients and limits thermokarst processes by enhancing hydrological  
connectivity (Morgenstern et al., 2021).



## 6. Conclusion

This study investigated the impacts of two TEGs in the Canadian High Arctic on ground ice content, cryostratigraphic patterns, and geomorphology to examine permafrost recovery following thermal erosion in ice-wedge polygonal tundra. Our results concurred with other research showing that thermal erosion affects hydrological connectivity, snow accumulation patterns and snowmelt dynamics, changes vegetation, causes the remobilization of soil material and nutrients, and showed that once stabilized, TEG permanently (at the Anthropocene scale) alter landscape morphology and ecosystem functions. In addition to the gully channel, the polygons bordering the TEG evolved from wet low-centered to dry/high-centered, causing changes in the ground thermal properties and ultimately leading to ice aggradation and raising the polygons. This cryostratigraphic pattern, in addition to vegetation colonization and decrease in slope angularity, were interpreted as stabilization mechanisms leading to permafrost aggradation and TEG stabilization. The study also reported the first VIC values in the slopes and at the bottom of the gully channel of TEG. Although the TEG caused discernable cryostratigraphic patterns, the ice contents in the cores affected by the TEG were comparable to undisturbed polygons. The presence of ice-rich geocryological layers and cold ground temperatures played a significant role in the inception and stabilization of the TEG by both buffering against smaller disturbances and promoting permafrost aggradation following thermal erosion. Once stabilized, the TEG was in a new state characterized by long-lasting geomorphological and hydrological changes to the landscape, but is able to recover to pre-disturbance geocryological and thermal conditions, showing that permafrost is more resilient to thermal erosion disturbances than surface geomorphology. This suggests that in stable environmental conditions undergoing natural variability, permafrost can persist longer than the geomorphological landforms in which it forms.

## 7. Competing interests

The contact author has declared that none of the authors has any competing interests.

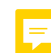

## 8. Acknowledgements

We thank Karine Rioux and Stéphanie Coulombe for their help during fieldwork. We also thank the Centre for Northern Studies for providing access and logistical support to its research station. We are also grateful to the Natural Sciences and Engineering Research Council of Canada, Parks Canada, Fonds de recherche du Québec - Nature et technologie, Northern Scientific Training Program and the Polar Continental Shelf Program (PCSP).

## 9. References

Abbott, B. W., Jones, J. B., Godsey, S. E., Larouche, J. R., and Bowden, W. B.: Patterns and persistence of hydrologic carbon and nutrient export from collapsing upland permafrost, *Biogeosciences*, 12, 3725–3740, <https://doi.org/10.5194/bg-12-3725-2015>, 2015.



- Allard, M.: Geomorphological Changes and Permafrost Dynamics: Key Factors in Changing Arctic Ecosystems. An Example from Bylot Island, Nunavut, Canada, *Geoscience Canada*, 23, 205–212, 1996.
- Allard, M., Sarrazin, D., and L'Hérault, E.: Borehole and near-surface ground temperatures in northeastern Canada, v. 1.5 (1988-2019). *Nordicana D8*, doi: 10.5885/45291SL-34F28A9491014AFD., 2020.
- 505 Andersland, O. B. and Ladanyi, B.: *Frozen Ground Engineering*, 2nd edition., Wiley, 384 pp., 2004.
- Arè, F. Èrnestovich., Balobaev, V. Tikhonovich., Bosikov, N. P., and Cold Regions Research and Engineering Laboratory (U.S.): Characteristics of the reshaping of shorelines of thermokarst lakes of central Yakutia., 1979.
- Blott, S. J. and Pye, K.: GRADISTAT: a grain size distribution and statistics package for the analysis of unconsolidated sediments, *Earth Surf. Process. Landforms*, 26, 1237–1248, <https://doi.org/10.1002/esp.261>, 2001.
- 510 Bowden, W. B., Gooseff, M. N., Balser, A., Green, A., Peterson, B. J., and Bradford, J.: Sediment and nutrient delivery from thermokarst features in the foothills of the North Slope, Alaska: Potential impacts on headwater stream ecosystems: Thermokarst Impacts on Stream Ecosystems, *J. Geophys. Res.*, 113, n/a-n/a, <https://doi.org/10.1029/2007JG000470>, 2008.
- Burn, C. R.: The development of near-surface ground ice during the Holocene at sites near Mayo, Yukon Territory, Canada, *Journal of Quaternary Science*, 3, 31–38, <https://doi.org/10.1002/jqs.3390030106>, 1988.
- 515 Burn, C. R.: Cryostratigraphy, paleogeography, and climate change during the early Holocene warm interval, western Arctic coast, Canada, *Can. J. Earth Sci.*, 34, 912–925, <https://doi.org/10.1139/e17-076>, 1997.
- Calmels, F. and Allard, M.: Ice segregation and gas distribution in permafrost using tomodesitometric analysis, *Permafrost Periglac. Process.*, 15, 367–378, <https://doi.org/10.1002/ppp.508>, 2004.
- 520 Climate station data from Bylot Island in Nunavut, Canada, v. 1.11 (1992-2019). *Nordicana D2*, doi: 10.5885/45039SL-EE76C1BDAADC4890: <http://www.cen.ulaval.ca/nordicanad/dpage.aspx?doi=45039SL-EE76C1BDAADC4890>.
- Chapin, F. S., Kofinas, G. P., and Folke, C. (Eds.): *Principles of Ecosystem Stewardship: Resilience-Based Natural Resource Management in a Changing World*, Springer New York, New York, NY, <https://doi.org/10.1007/978-0-387-73033-2>, 2009.
- Coulombe, S., Fortier, D., Lacelle, D., Kanevskiy, M., and Shur, Y.: Origin, burial and preservation of late Pleistocene-age glacier ice in Arctic permafrost (Bylot Island, NU, Canada), *The Cryosphere*, 13, 97–111, <https://doi.org/10.5194/tc-13-97-2019>, 2019.
- 525 **Historical Climate Data - Climatic data of Pond Inlet, Nunavut: [https://climate.weather.gc.ca/index\\_e.html](https://climate.weather.gc.ca/index_e.html), last access: 15 June 2022.**
- Folk, R. L. and Ward, W. C.: Brazos River bar [Texas]; a study in the significance of grain size parameters, *Journal of Sedimentary Research*, 27, 3–26, <https://doi.org/10.1306/74D70646-2B21-11D7-8648000102C1865D>, 1957.
- 530 **Fortier, D. and Allard, M.: Late Holocene syngenetic ice-wedge polygons development, Bylot Island, Canadian Arctic Archipelago, 41, 16, 2004.**
- Fortier, D., Allard, M., and Pivot, F.: A late-Holocene record of loess deposition in ice-wedge polygons reflecting wind activity and ground moisture conditions, Bylot Island, eastern Canadian Arctic, *The Holocene*, 16, 635–646, <https://doi.org/10.1191/0959683606h1960rp>, 2006.
- 535

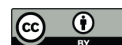

- Fortier, D., Allard, M., and Shur, Y.: Observation of rapid drainage system development by thermal erosion of ice wedges on Bylot Island, Canadian Arctic Archipelago, *Permafrost Periglac. Process.*, 18, 229–243, <https://doi.org/10.1002/ppp.595>, 2007.
- French, H. and Shur, Y.: The principles of cryostratigraphy, *Earth-Science Reviews*, 101, 190–206, 540 <https://doi.org/10.1016/j.earscirev.2010.04.002>, 2010.
- French, H. M.: *The Periglacial Environment*, 3rd edition., John Wiley & Sons Ltd, Sussex, England, 458 pp., 2007.
- French, H. M.: *The periglacial environment*, Fourth edition., Wiley, Blackwell, Hoboken, NJ, 1 pp., 2017.
- Gagnon, S. and Allard, M.: Changes in ice-wedge activity over 25 years of climate change near Salluit, Nunavik (northern Québec, Canada), *Permafrost and Periglac Process*, 31, 69–84, <https://doi.org/10.1002/ppp.2030>, 2019.
- 545 Gagnon, S. and Allard, M.: Geomorphological controls over carbon distribution in permafrost soils: the case of the Narsajuaq river valley, Nunavik (Canada), *Arctic Science*, 6, 509–528, <https://doi.org/10.1139/as-2019-0026>, 2020.
- Gilbert, G. L., Kanevskiy, M., and Murton, J. B.: Recent Advances (2008-2015) in the Study of Ground Ice and Cryostratigraphy: Recent Advances in the Study of Ground Ice and Cryostratigraphy, *Permafrost and Periglac. Process.*, 27, 377–389, <https://doi.org/10.1002/ppp.1912>, 2016.
- 550 Godin, E. and Fortier, D.: Geomorphology of thermo-erosion gullies – case study from Bylot Island, Nunavut, Canada, <https://doi.org/10.13140/2.1.4498.9120>, 2010.
- Godin, E. and Fortier, D.: Fine Scale Spatio-Temporal Monitoring of Multiple Thermo-Erosion Gullies Development on Bylot Island, Eastern Canadian Archipelago, 7, 2012a.
- Godin, E. and Fortier, D.: Geomorphology of a thermo-erosion gully, Bylot Island, Nunavut, Canada, *Can. J. Earth Sci.*, 49, 555 979–986, <https://doi.org/10.1139/e2012-015>, 2012b.
- Godin, E., Fortier, D., and Coulombe, S.: Effects of thermo-erosion gullying on hydrologic flow networks, discharge and soil loss, *Environ. Res. Lett.*, 9, 105010, <https://doi.org/10.1088/1748-9326/9/10/105010>, 2014.
- Godin, E., Fortier, D., and Lévesque, E.: Nonlinear thermal and moisture response of ice-wedge polygons to permafrost disturbance increases heterogeneity of high Arctic wetland, *Biogeosciences*, 13, 1439–1452, <https://doi.org/10.5194/bg-13-1439-2016>, 2016. 560
- Goudie, A. (Ed.): *Encyclopedia of geomorphology*, Routledge : International Association of Geomorphologists, London ; New York, 2 pp., 2004.
- Grosse, G., Schirmermeister, L., Kunitsky, V. V., and Hubberten, H.-W.: The use of CORONA images in remote sensing of periglacial geomorphology: an illustration from the NE Siberian coast, *Permafrost and Periglacial Processes*, 16, 163–172, 565 <https://doi.org/10.1002/ppp.509>, 2005.
- Grosse, G., Schirmermeister, L., and Malthus, T. J.: Application of Landsat-7 satellite data and a DEM for the quantification of thermokarst-affected terrain types in the periglacial Lena–Anabar coastal lowland, *Polar Research*, 25, 51–67, <https://doi.org/10.3402/polar.v25i1.6238>, 2006.
- 570 Inland Waters Branch: *Glacier atlas of Canada*, Bylot Island area, 46201, Inland Waters Branch., Ottawa, Ontario, Canada, 1969.



- Jongejans, L. L., Strauss, J., Lenz, J., Peterse, F., Mangelsdorf, K., Fuchs, M., and Grosse, G.: Organic matter characteristics in yedoma and thermokarst deposits on Baldwin Peninsula, west Alaska, *Biogeosciences*, 15, 6033–6048, <https://doi.org/10.5194/bg-15-6033-2018>, 2018.
- 575 Jorgenson, M. T., Romanovsky, V., Harden, J., Shur, Y., O'Donnell, J., Schuur, E. A. G., Kanevskiy, M., and Marchenko, S.: Resilience and vulnerability of permafrost to climate change, *Can. J. For. Res.*, 40, 1219–1236, <https://doi.org/10.1139/X10-060>, 2010.
- Kanevskiy, M., Shur, Y., Fortier, D., Jorgenson, M. T., and Stephani, E.: Cryostratigraphy of late Pleistocene syngenetic permafrost (yedoma) in northern Alaska, Itkillik River exposure, *Quat. res.*, 75, 584–596, <https://doi.org/10.1016/j.yqres.2010.12.003>, 2011.
- 580 Kanevskiy, M., Shur, Y., Connor, B., Dillon, M., Stephani, E., and O'Donnell, J.: Study of the Ice-Rich Syngenetic Permafrost for Road Design (Interior Alaska), in: Proceedings of the Tenth International Conference on Permafrost, Tenth International Conference on Permafrost, Boulders, Colorado, US, journalAbbreviation: Proceedings of the Tenth International Conference on Permafrost, 2012.
- 585 Kanevskiy, M., Shur, Y., Jorgenson, M. T., Ping, C.-L., Michaelson, G. J., Fortier, D., Stephani, E., Dillon, M., and Tumskey, V.: Ground ice in the upper permafrost of the Beaufort Sea coast of Alaska, *Cold Regions Science and Technology*, 85, 56–70, <https://doi.org/10.1016/j.coldregions.2012.08.002>, 2013.
- Kanevskiy, M., Jorgenson, T., Shur, Y., O'Donnell, J. A., Harden, J. W., Zhuang, Q., and Fortier, D.: Cryostratigraphy and Permafrost Evolution in the Lacustrine Lowlands of West-Central Alaska: Cryostratigraphy and Permafrost Evolution in the Lacustrine Lowlands, Alaska, *Permafrost and Periglac. Process.*, 25, 14–34, <https://doi.org/10.1002/ppp.1800>, 2014.
- 590 Kanevskiy, M., Shur, Y., Walker, D., Buchhorn, M., Jorgenson, T., Matyshak, G., Reynolds, M., Peirce, J., and Wirth, L.: Evaluation of Risk of Ice-Wedge Degradation, Prudhoe Bay Oilfield, AK., 2016.
- Kanevskiy, M., Shur, Y., Jorgenson, T., Brown, D. R. N., Moskalenko, N., Brown, J., Walker, D. A., Reynolds, M. K., and Buchhorn, M.: Degradation and stabilization of ice wedges: Implications for assessing risk of thermokarst in northern Alaska, *Geomorphology*, 297, 20–42, <https://doi.org/10.1016/j.geomorph.2017.09.001>, 2017.
- 595 Kokelj, S. V. and Jorgenson, M. T.: Advances in Thermokarst Research: Recent Advances in Research Investigating Thermokarst Processes, *Permafrost and Periglac. Process.*, 24, 108–119, <https://doi.org/10.1002/ppp.1779>, 2013.
- Lacelle, D., Bjornson, J., and Lauriol, B.: Climatic and geomorphic factors affecting contemporary (1950-2004) activity of retrogressive thaw slumps on the Aklavik Plateau, Richardson Mountains, NWT, Canada: Climatic and Geomorphic Factors affecting Thaw Slump Activity, *Permafrost Periglac. Process.*, 21, 1–15, <https://doi.org/10.1002/ppp.666>, 2010.
- 600 Lantz, T. C. and Kokelj, S. V.: Increasing rates of retrogressive thaw slump activity in the Mackenzie Delta region, N.W.T., Canada, *Geophys. Res. Lett.*, 35, L06502, <https://doi.org/10.1029/2007GL032433>, 2008.
- Levy, J. S., Head, J. W., and Marchant, D. R.: The role of thermal contraction crack polygons in cold-desert fluvial systems, *Antarctic Science*, 20, 565–579, <https://doi.org/10.1017/S0954102008001375>, 2008.
- 605 Lewkowicz, A. G.: Ice-wedge rejuvenation, *fosheim peninsula, ellesmere Island*, Canada, *Permafrost Periglac. Process.*, 5, 251–268, <https://doi.org/10.1002/ppp.3430050405>, 1994.
- Liljedahl, A., Hinzman, L., Busey, R., and Yoshikawa, K.: Physical short-term changes after a tussock tundra fire, Seward Peninsula, Alaska, *J. Geophys. Res.*, 112, F02S07, <https://doi.org/10.1029/2006JF000554>, 2007.

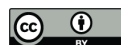

- Mackay, J. R.: The World of Underground Ice, *Annals of the Association of American Geographers*, 62, 1–22, 1972.
- 610 Maxwell, J. B.: The climate of the Canadian Arctic islands and adjacent waters / Le climat des îles arctiques et des eaux adjacentes du Canada, Environment Canada, Atmospheric Environment Service., Hull, QC, Canada, 1980.
- McRoberts, E. C. and Nixon, J. F.: Reticulate Ice Veins in Permafrost, Northern Canada: Discussion, *Can. Geotech. J.*, 12, 159–162, <https://doi.org/10.1139/t75-017>, 1975.
- Morgenstern, A., Overduin, P. P., Günther, F., Stettner, S., Ramage, J., Schirrmeister, L., Grigoriev, M. N., and Grosse, G.: Thermo-erosional valleys in Siberian ice-rich permafrost, *Permafrost and Periglac Process*, 32, 59–75, 615 <https://doi.org/10.1002/ppp.2087>, 2021.
- Murton, J. B.: 8.14 Ground Ice and Cryostratigraphy, in: *Treatise on Geomorphology*, Elsevier, 173–201, <https://doi.org/10.1016/B978-0-12-374739-6.00206-2>, 2013.
- Murton, J. B. and French, H. M.: Cryostructures in permafrost, Tuktoyaktuk coastlands, western arctic Canada, *Can. J. Earth Sci.*, 31, 737–747, <https://doi.org/10.1139/e94-067>, 1994.
- 620 Olefeldt, D., Goswami, S., Grosse, G., Hayes, D., Hugelius, G., Kuhry, P., McGuire, A. D., Romanovsky, V. E., Sannel, A. B. K., Schuur, E. A. G., and Turetsky, M. R.: Circumpolar distribution and carbon storage of thermokarst landscapes, *Nat Commun*, 7, 13043, <https://doi.org/10.1038/ncomms13043>, 2016.
- Paquette, M., Fortier, D., and Lamoureux, S. F.: Cryostratigraphical studies of ground ice formation and distribution in a High Arctic polar desert landscape, Resolute Bay, Nunavut, *Can. J. Earth Sci.*, 59, 759–771, <https://doi.org/10.1139/cjes-2020-0134>, 2022. 625
- Perreault, N., Lévesque, E., Fortier, D., and Lamarque, L. J.: Thermo-erosion gullies boost the transition from wet to mesic tundra vegetation, *Biogeosciences*, 13, 1237–1253, <https://doi.org/10.5194/bg-13-1237-2016>, 2016.
- Piégay, H., Chabot, A., and Le Lay, Y.-F.: Some comments about resilience: From cyclicity to trajectory, a shift in living and nonliving system theory, *Geomorphology*, 367, 106527, <https://doi.org/10.1016/j.geomorph.2018.09.018>, 2020.
- 630 Rioux, K.: Impacts de la dégradation du pergélisol par thermo-érosion sur les processus hydrologiques et les flux de matières, M.Sc. géographie, Université de Montréal, Montréal, QC, Canada, 83 pp., 2020.
- Shur, Y., Hinkel, K. M., and Nelson, F. E.: The transient layer: implications for geocryology and climate-change science, *Permafrost Periglac. Process.*, 16, 5–17, <https://doi.org/10.1002/ppp.518>, 2005.
- Shur, Y., Jones, B. M., Kanevskiy, M., Jorgenson, T., Jones, M. K. W., Fortier, D., Stephani, E., and Vasiliev, A.: Fluvio-thermal erosion and thermal denudation in the yedoma region of northern Alaska: Revisiting the Itkillik River exposure, *Permafrost and Periglac Process*, 32, 277–298, <https://doi.org/10.1002/ppp.2105>, 2021. 635
- Shur, Y. L.: The upper horizon of permafrost soils, in: *Proceedings of the fifth international conference on permafrost*, 867–871, 1988.
- 640 Smith, S. L. and Burgess, M. M.: A digital database of permafrost thickness in Canada, <https://doi.org/10.4095/213043>, 2002.

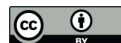

Strauss, J., Schirrmeister, L., Grosse, G., Wetterich, S., Ulrich, M., Herzsuh, U., and Hubberten, H.: The deep permafrost carbon pool of the Yedoma region in Siberia and Alaska, *Geophys. Res. Lett.*, 40, 6165–6170, <https://doi.org/10.1002/2013GL058088>, 2013.

645 Thévenin, E.: Les lithales : étude d'un pergélisol marginal en dégradation dans la vallée Ä'ä y Chù, au Sud-Ouest du Yukon, Mémoire de maîtrise, Université de Montréal, Montréal, QC, Canada, 2023.

Thoms, M. C., Piégay, H., and Parsons, M.: What do you mean, 'resilient geomorphic systems'?, *Geomorphology*, 305, 8–19, <https://doi.org/10.1016/j.geomorph.2017.09.003>, 2018.

Toniolo, H., Kodial, P., Hinzman, L. D., and Yoshikawa, K.: Spatio-temporal evolution of a thermokarst in Interior Alaska, *Cold Regions Science and Technology*, 56, 39–49, <https://doi.org/10.1016/j.coldregions.2008.09.007>, 2009.

650 Turetsky, M. R., Abbott, B. W., Jones, M. C., Anthony, K. W., Olefeldt, D., Schuur, E. A. G., Grosse, G., Kuhry, P., Hugelius, G., Koven, C., Lawrence, D. M., Gibson, C., Sannel, A. B. K., and McGuire, A. D.: Carbon release through abrupt permafrost thaw, *Nat. Geosci.*, 13, 138–143, <https://doi.org/10.1038/s41561-019-0526-0>, 2020.

655 Veillette, A.: Stabilisation du paysage périglaciaire suite à un épisode de ravinement par thermo-érosion : implication pour la structure et la stabilité thermique du pergélisol de surface, M.Sc. géographie, Université de Montréal, Montréal, QC, Canada, 91 pp., 2019.
